# Supplementary material for: Selective halocyclization and iodosulfonylation ofN-benzothiazol-2-yl alkynamides under mild conditions
Source: Royal Society of Chemistry journal article supplement (doi:10.1039/d2ob01165d), 2022-01-01

## Supporting Information

### Selective halocyclization and iodosulfonylation of *N*- benzothiazol-2-yl alkynamides under mild conditions

Yu Fang,<sup>‡a</sup> Shangfeng Ren,<sup>‡a</sup> Chen He,<sup>b</sup> Huiqi Han,<sup>b</sup> Jin-Biao Liu,<sup>\*a</sup> Fumin Liao,<sup>a</sup> and Min Yang<sup>\*b</sup>

1. General experimental methods.
2. General experimental procedure.
3. X-ray Crystal structure and crystal data of compound **3a**.
4. Characterization data.
5. <sup>1</sup>H, <sup>13</sup>C and <sup>19</sup>F NMR of Compounds **3**, **4**, **5**, **6**.

## 1. General experimental methods.

Unless otherwise noted, all of the reagents were purchased from commercial suppliers and used without purification. Reactions were monitored by thin layer chromatography (TLC) supplied by Yantai Xinnuo New Material Company (China). Purification of products was conducted by flash chromatography on silica gel (200-300 mesh). Melting point were determined using WRX-4 (Shanghai Physico-Optical instrument). Nuclear magnetic resonance (NMR) spectra were measured on a Bruker Avance NEO (400 MHz). Chemical shifts are reported in ppm using tetramethylsilane as internal standard (s = singlet, d = doublet, t = triplet, q = quartet, dd = doublet of doublets, m = multiplet). HRMS data were obtained on a VG ZAB-HS mass spectrometer, Bruker Apex IV FTMS spectrometer. X-Ray single-crystal diffraction data were collected on an Agilent Technologies Gemini single-crystal diffractometer.

## 2. General experimental procedure

### 2.1 Synthesis of compound 3

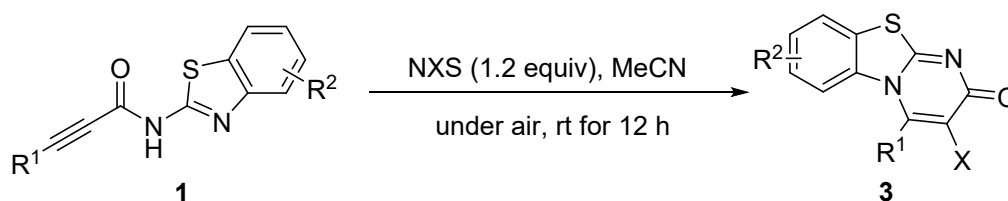

To a mixture of *N*-benzothiazol-2-yl alkyne amides **1** (0.2 mmol) and NXS (0.24 mmol) in a 20 mL test tube at room temperature was added the MeCN (2 mL). The reaction vessel was allowed to stir at room temperature for 12 h. After completion of reaction as indicated by TLC, the solvent was evaporated and the residue was purified directly by flash column chromatography using a mixture of dichloromethane and ethyl acetate as eluent to give the desired product **3a-3q**.

### 2.2 Synthesis of compound 4

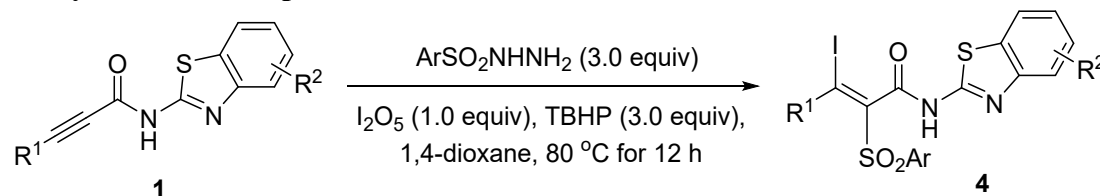

*N*-benzothiazol-2-yl alkyne amides **1** (0.2 mmol), sulfonylhydrazides (0.6 mmol),  $\text{I}_2\text{O}_5$  (0.2 mmol), TBHP (0.6 mmol) were mixed with 1,4-dioxane (2 mL). The reaction was then heated in an oil bath at 80 °C for 12 h. After completion of reaction as indicated by TLC, the reaction was cooled to room temperature, extracted with

ethyl acetate (10 mL), the organic phase was separated, dried over Na<sub>2</sub>SO<sub>4</sub> and concentrated under vacuum. The residue was purified by flash column chromatography using petroleum ether/ethyl acetate solution as eluent to give the desired product **4a-4f**.

### 2.3 Synthesis of compound **5** and **6**

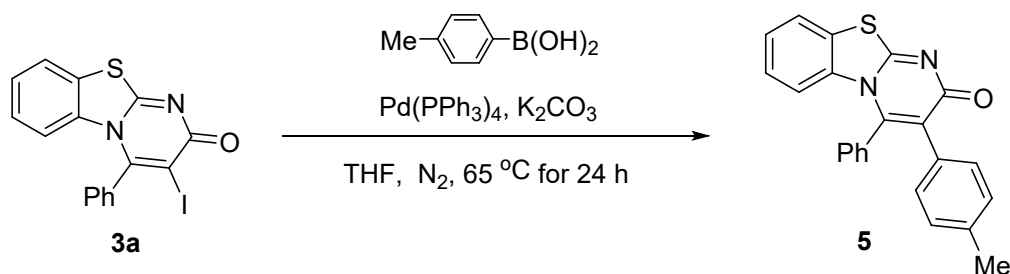

To a mixture of 3-iodo-4-phenyl-2H-benzo[4,5]thiazolo[3,2-a]pyrimidin-2-one **3a** (0.2 mmol), Pd(PPh<sub>3</sub>)<sub>4</sub> (0.08 mmol) and *p*-tolylboronic acid (0.6 mmol) in THF (2 mL) at room temperature in N<sub>2</sub> atmosphere. The reaction was then heated in an oil bath at 65 °C for 24 h. After that, the reaction was cooled to room temperature, diluted with ethyl acetate (2 mL), and then washed with sat. NH<sub>4</sub>Cl (5 mL). The organic phase was separated, dried over Na<sub>2</sub>SO<sub>4</sub> and concentrated under vacuum. The residue was purified by flash column chromatography using petroleum ether/ethyl acetate solution as eluent to give the desired product **5** in 85% yield.

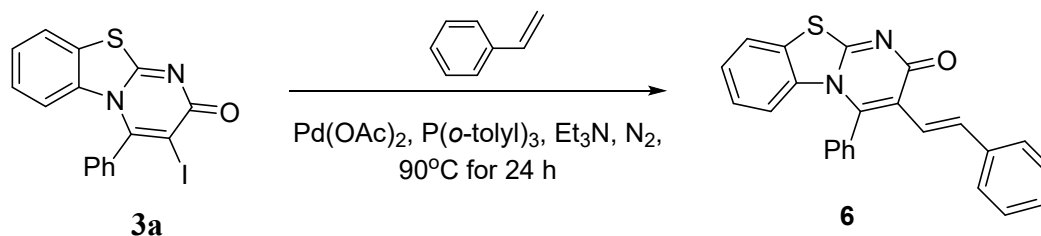

A 10-mL Schlenk tube was charged with 3-iodo-4-phenyl-2H-benzo[4,5]thiazolo[3,2-a]pyrimidin-2-one **3a** (0.2 mmol), Pd(OAc)<sub>2</sub> (0.004 mmol), P(*o*-tolyl)<sub>3</sub> (0.012 mmol), styrene (0.3 mmol) and triethylamine (0.8 mmol). The reaction was heated at 90 °C under N<sub>2</sub> for 24 h. After that, the reaction was concentrated under vacuum and directly purified by flash column chromatography using methanol/dichloromethane solution as eluent to give the desired product **6** in 71% yield.

### 3. X-ray Crystal structure and crystal data of compound **3a**

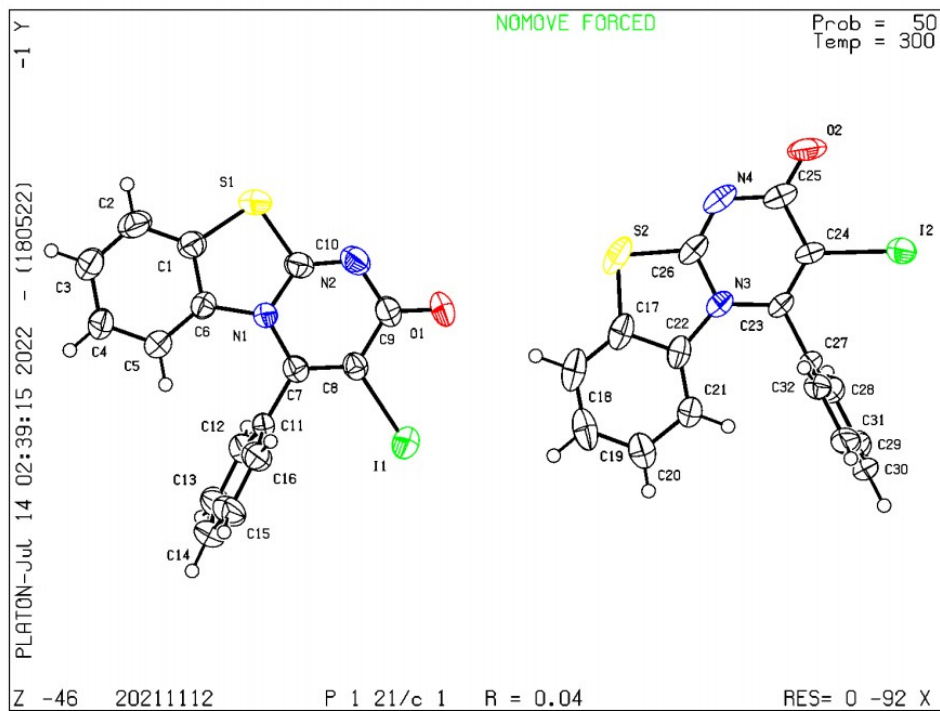**Datablock: 20211112**

Bond precision: C-C = 0.0070 Å

Wavelength=0.71073

Cell: a=19.9343 (14)

b=7.2169 (5)

c=20.7700 (14)

alpha=90

beta=104.434 (7)

gamma=90

Temperature: 300 K

|                        | Calculated      | Reported        |
|------------------------|-----------------|-----------------|
| Volume                 | 2893.7 (4)      | 2893.7 (4)      |
| Space group            | P 21/c          | P 1 21/c 1      |
| Hall group             | -P 2ybc         | -P 2ybc         |
| Moiety formula         | C16 H9 I N2 O S | C16 H9 I N2 O S |
| Sum formula            | C16 H9 I N2 O S | C16 H9 I N2 O S |
| Mr                     | 404.21          | 404.21          |
| Dx, g cm <sup>-3</sup> | 1.856           | 1.856           |
| Z                      | 8               | 8               |
| Mu (mm <sup>-1</sup> ) | 2.356           | 2.356           |
| F000                   | 1568.0          | 1568.0          |
| F000'                  | 1565.69         |                 |
| h, k, lmax             | 27, 10, 28      | 27, 9, 28       |
| Nref                   | 8098            | 6791            |
| Tmin, Tmax             | 0.661, 0.736    | 0.496, 1.000    |
| Tmin'                  | 0.633           |                 |

Correction method= # Reported T Limits: Tmin=0.496 Tmax=1.000

AbsCorr = MULTI-SCAN

Data completeness= 0.839

Theta (max)= 29.577

R(reflections)= 0.0432 ( 4708)

wR2(reflections)=  
0.0940 ( 6791)

S = 1.022

Npar= 380

## 4. Characterization data

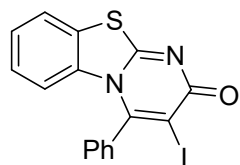

### 3-iodo-4-phenyl-2H-benzo[4,5]thiazolo[3,2-a]pyrimidin-2-one (**3a**)

white solid, m.p. 232-237 °C

77.4 mg, 96%; ethyl acetate/dichloromethane = 1/8,  $R_f$  = 0.5

$^1\text{H}$  NMR (400 MHz,  $\text{DMSO-}d_6$ )  $\delta$  7.88 (d,  $J$  = 7.8 Hz, 1H), 7.61 (d,  $J$  = 5.6 Hz, 3H), 7.48 (d,  $J$  = 5.7 Hz, 2H), 7.24 (t,  $J$  = 7.6 Hz, 1H), 6.96 (t,  $J$  = 8.0 Hz, 1H), 5.54 (d,  $J$  = 8.7 Hz, 1H).  $^{13}\text{C}$  NMR (101 MHz,  $\text{DMSO-}d_6$ )  $\delta$  165.1, 164.3, 151.2, 136.6, 136.3, 131.4, 130.1, 129.5, 126.7, 126.6, 124.4, 124.3, 116.4, 96.1. HRMS (ESI)  $m/z$ : calcd for  $\text{C}_{16}\text{H}_9\text{IN}_2\text{NaOS}$   $[\text{M}+\text{Na}]^+$  426.9372, found: 426.9369.

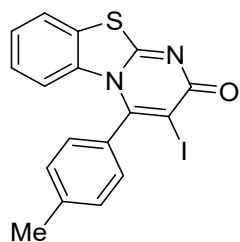

### 3-iodo-4-(p-tolyl)-2H-benzo[4,5]thiazolo[3,2-a]pyrimidin-2-one (**3b**)

white solid, m.p. 242-243 °C

70.0 mg, 85%; methanol/dichloromethane = 1/50,  $R_f$  = 0.5

$^1\text{H}$  NMR (400 MHz,  $\text{CDCl}_3$ )  $\delta$  7.59 (dd,  $J$  = 7.9, 1.4 Hz, 1H), 7.49-7.43 (m, 2H), 7.31-7.26 (m, 3H), 7.01 (ddd,  $J$  = 8.8, 7.4, 1.4 Hz, 1H), 5.89-5.83 (m, 1H), 2.56 (s, 3H).  $^{13}\text{C}$  NMR (101 MHz,  $\text{CDCl}_3$ )  $\delta$  164.6, 141.7, 135.7, 133.0, 130.7, 128.7, 126.6, 126.4, 124.5, 123.0, 116.8, 96.0, 21.8. HRMS (ESI)  $m/z$ : calcd for  $\text{C}_{17}\text{H}_{12}\text{IN}_2\text{OS}$   $[\text{M}+\text{H}]^+$  418.9710, found: 418.9709.

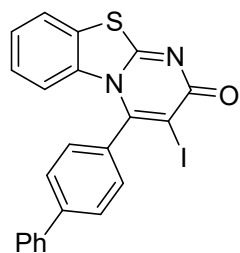

### 4-([1,1'-biphenyl]-4-yl)-3-iodo-2H-benzo[4,5]thiazolo[3,2-a]pyrimidin-2-one (**3c**)

White solid, m.p. 285-288 °C

83.4 mg, 88%; ethyl acetate/dichloromethane = 1/8,  $R_f$  = 0.6

$^1\text{H}$  NMR (400 MHz,  $\text{DMSO-}d_6$ )  $\delta$  7.94 (d,  $J$  = 8.0 Hz, 2H), 7.89 (d,  $J$  = 7.9 Hz, 1H), 7.79 (d,  $J$  = 7.7 Hz, 2H), 7.57 (d,  $J$  = 8.0 Hz, 2H), 7.47 (t,  $J$  = 7.5 Hz, 2H), 7.38 (t,  $J$  = 7.3 Hz, 1H), 7.25 (t,  $J$  = 7.6 Hz, 1H), 7.00 (t,  $J$  = 8.1 Hz, 1H), 5.77 (d,  $J$  = 8.8 Hz, 1H).  $^{13}\text{C}$  NMR (101 MHz,  $\text{DMSO-}d_6$ )  $\delta$  165.2, 164.3, 151.0, 142.5, 139.2, 136.4, 135.6, 130.2, 129.6, 128.8, 128.1, 127.4, 126.8, 126.6, 124.4, 124.3, 116.5, 96.3. HRMS (ESI)  $m/z$ : calcd for  $\text{C}_{20}\text{H}_{11}\text{IN}_2\text{NaOS}$   $[\text{M}+\text{Na}]^+$  502.9685, found : 502.9679.

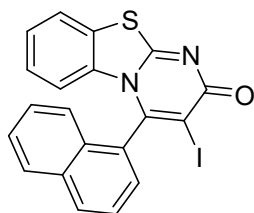

3-iodo-4-(naphthalen-1-yl)-2H-benzo[4,5]thiazolo[3,2-a]pyrimidin-2-one (**3d**)

white solid, m.p. 261-263 °C

71.1 mg, 79%; ethyl acetate/dichloromethane = 1/8,  $R_f$  = 0.4

$^1\text{H}$  NMR (400 MHz,  $\text{DMSO-}d_6$ )  $\delta$  8.31-8.29 (m, 1H), 8.15 (d,  $J$  = 8.2 Hz, 1H), 7.94 (d,  $J$  = 7.9 Hz, 1H), 7.84 (d,  $J$  = 8.4 Hz, 1H), 7.80-7.75 (m, 2H), 7.64 (t,  $J$  = 7.5 Hz, 1H), 7.55-7.51 (m, 1H), 7.24 (t,  $J$  = 7.6 Hz, 1H), 6.86-6.80 (m, 1H), 5.76 (s, 1H), 5.37 (d,  $J$  = 8.7 Hz, 1H).  $^{13}\text{C}$  NMR (101 MHz,  $\text{DMSO-}d_6$ )  $\delta$  165.5, 164.3, 149.7, 136.0, 133.8, 133.6, 131.7, 130.1, 129.3, 128.5, 128.4, 127.7, 126.8, 126.6, 126.5, 125.0, 124.5, 124.3, 115.8, 98.0. HRMS (ESI)  $m/z$ : calcd for  $\text{C}_{20}\text{H}_{11}\text{IN}_2\text{NaOS}$   $[\text{M}+\text{Na}]^+$  476.9529, found : 476.9519.

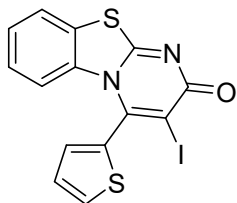

3-iodo-4-(thiophen-2-yl)-2H-benzo[4,5]thiazolo[3,2-a]pyrimidin-2-one (**3e**)

white solid, m.p. 231-233 °C

41.8 mg, 51%; ethyl acetate/dichloromethane = 1/8,  $R_f$  = 0.5

$^1\text{H}$  NMR (400 MHz,  $\text{DMSO-}d_6$ )  $\delta$  8.05 (d,  $J$  = 5.0 Hz, 1H), 7.98 (d,  $J$  = 7.9 Hz, 1H), 7.45-7.44 (m, 1H), 7.39-7.35 (m, 2H), 7.20-7.15 (m, 1H), 5.80 (d,  $J$  = 8.7 Hz, 1H).

$^{13}\text{C}$  NMR (101 MHz,  $\text{DMSO-}d_6$ )  $\delta$  165.3, 164.1, 145.2, 136.3, 131.6, 131.4, 128.8, 126.9, 126.7, 124.2, 116.2, 100.1. HRMS (ESI)  $m/z$ : calcd for  $\text{C}_{14}\text{H}_7\text{IN}_2\text{NaOS}_2$   $[\text{M}+\text{Na}]^+$  432.8937, found : 432.8933.

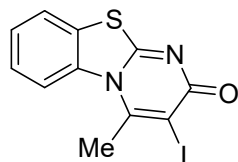

3-iodo-4-methyl-2H-benzo[4,5]thiazolo[3,2-a]pyrimidin-2-one (**3f**)

white solid, m.p. 219-220 °C

62.7 mg, 92%; ethyl acetate/dichloromethane = 1/8,  $R_f$  = 0.5

$^1\text{H}$  NMR (400 MHz,  $\text{DMSO-}d_6$ )  $\delta$  8.00 (d,  $J$  = 8.2 Hz, 1H), 7.93 (d,  $J$  = 7.1 Hz, 1H), 7.46-7.35 (m, 2H), 3.07 (s, 3H).  $^{13}\text{C}$  NMR (101 MHz,  $\text{DMSO}$ )  $\delta$  164.8, 163.9, 150.6, 136.9, 127.4, 126.7, 124.3, 124.2, 118.4, 95.7, 40.6, 40.4, 40.2, 40.0, 39.8, 39.6, 39.4, 28.5. HRMS (ESI)  $m/z$ : calcd for  $\text{C}_{11}\text{H}_7\text{IN}_2\text{NaOS}$   $[\text{M}+\text{Na}]^+$  364.9216, found : 364.9215.

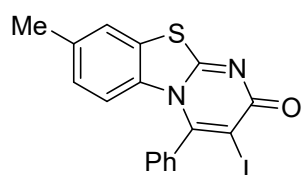

3-iodo-8-methyl-4-phenyl-2H-benzo[4,5]thiazolo[3,2-a]pyrimidin-2-one (**3g**)

white solid, m.p. 284-286 °C

36.5 mg, 44%; ethyl acetate/dichloromethane = 1/8,  $R_f$  = 0.5

$^1\text{H}$  NMR (400 MHz,  $\text{DMSO-}d_6$ )  $\delta$  7.75 (s, 1H), 7.70-7.68 (m, 3H), 7.55-7.53 (m, 2H), 6.87-6.84 (m, 1H), 5.48 (d,  $J$  = 8.8 Hz, 1H), 2.27 (s, 3H).  $^{13}\text{C}$  NMR (101 MHz,  $\text{DMSO-}d_6$ )  $\delta$  164.9, 164.4, 151.1, 136.5, 136.5, 134.2, 131.4, 130.1, 129.5, 127.6, 124.3, 124.0, 116.1, 95.7, 20.8. HRMS (ESI)  $m/z$ : calcd for  $\text{C}_{17}\text{H}_{12}\text{IN}_2\text{OS}$   $[\text{M}+\text{H}]^+$  418.9710, found : 418.9709

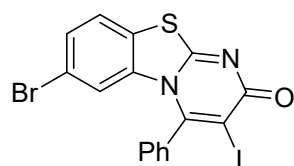

7-bromo-3-iodo-4-phenyl-2H-benzo[4,5]thiazolo[3,2-a]pyrimidin-2-one (**3h**)

white solid, m.p. 237-240 °C

49.1 mg, 51%; ethyl acetate/dichloromethane = 1/8,  $R_f$  = 0.6

$^1\text{H}$  NMR (400 MHz,  $\text{DMSO-}d_6$ )  $\delta$  7.83 (d,  $J$  = 8.5 Hz, 1H), 7.68-7.61 (m, 3H), 7.43-7.47 (m, 3H), 5.51 (s, 1H).  $^{13}\text{C}$  NMR (101 MHz,  $\text{DMSO-}d_6$ )  $\delta$  165.4, 164.2, 150.9, 137.2, 136.2, 131.5, 130.2, 129.5, 129.0, 125.8, 123.8, 119.5, 119.2, 95.9. HRMS (ESI)  $m/z$ : calcd for  $\text{C}_{16}\text{H}_8\text{BrIN}_2\text{NaOS}$   $[\text{M}+\text{Na}]^+$  504.8478, found : 504.8469.

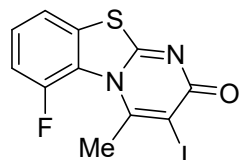

6-fluoro-3-iodo-4-methyl-2H-benzo[4,5]thiazolo[3,2-a]pyrimidin-2-one (**3i**)

white solid, m.p. 220-222 °C

14.4 mg, 20%; ethyl acetate/dichloromethane = 1/8,  $R_f$  = 0.5

$^1\text{H}$  NMR (400 MHz,  $\text{CDCl}_3$ )  $\delta$  7.51-7.43 (m, 2H), 7.29-7.24 (m, 1H), 2.87 (d,  $J$  = 10.8 Hz, 3H).  $^{13}\text{C}$  NMR (101 MHz,  $\text{CDCl}_3$ )  $\delta$  163.9 (d,  $J$  = 3.3 Hz), 151.1, 149.4, 148.5, 128.1 (d,  $J$  = 8.5 Hz), 127.6, 123.2, 119.2 (d,  $J$  = 3.7 Hz), 115.3 (d,  $J$  = 22.6 Hz), 92.9, 28.4 (d,  $J$  = 20.8 Hz).  $^{19}\text{F}$  NMR (377 MHz,  $\text{CDCl}_3$ )  $\delta$  -109.4. HRMS (ESI)  $m/z$ : calcd for  $\text{C}_{11}\text{H}_7\text{FIN}_2\text{OS}$   $[\text{M}+\text{H}]^+$  360.9302, found : 360.9287.

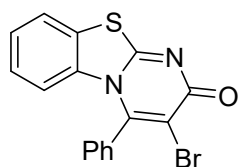

3-bromo-4-phenyl-2H-benzo[4,5]thiazolo[3,2-a]pyrimidin-2-one (**3j**)

white solid, m.p. 239-240 °C

62.5 mg, 88%; ethyl acetate/dichloromethane = 1/8,  $R_f$  = 0.5

$^1\text{H}$  NMR (400 MHz,  $\text{DMSO-}d_6$ )  $\delta$  7.90 (d,  $J$  = 7.4 Hz, 1H), 7.64-7.58 (m, 3H), 7.54-7.52 (m, 2H), 7.26 (t,  $J$  = 7.6 Hz, 1H), 7.01-6.95 (m, 1H), 5.60 (d,  $J$  = 8.7 Hz, 1H).  $^{13}\text{C}$  NMR (101 MHz,  $\text{DMSO-}d_6$ )  $\delta$  164.3, 162.4, 148.3, 136.4, 133.2, 131.5, 130.2, 129.4, 126.8, 126.6, 124.7, 124.4, 116.1, 113.8. HRMS (ESI)  $m/z$ : calcd for  $\text{C}_{16}\text{H}_9\text{BrN}_2\text{NaOS}$   $[\text{M}+\text{Na}]^+$  378.9511; found : 378.9501.



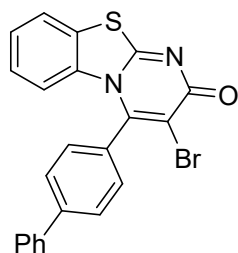

4-([1,1'-biphenyl]-4-yl)-3-bromo-2H-benzo[4,5]thiazolo[3,2-a]pyrimidin-2-one (**3k**)

white solid, m.p. 270-272 °C

69.8 mg, 81%; ethyl acetate/dichloromethane = 1/8,  $R_f$  = 0.4

$^1\text{H}$  NMR (400 MHz,  $\text{CDCl}_3$ )  $\delta$  7.91-7.89 (m, 2H), 7.76-7.74 (m, 2H), 7.63-7.61 (m, 1H), 7.56-7.44 (m, 5H), 7.30 (t,  $J$  = 7.7 Hz, 1H), 7.04-6.99 (m, 1H), 6.05 (d,  $J$  = 8.7 Hz, 1H).  $^{13}\text{C}$  NMR (101 MHz,  $\text{CDCl}_3$ )  $\delta$  163.8, 162.6, 147.1, 143.9, 139.3, 135.7, 131.1, 129.3, 129.2, 128.5, 128.4, 127.2, 126.7, 126.5, 124.7, 123.2, 116.4, 114.9. HRMS (ESI)  $m/z$ : calcd for  $\text{C}_{22}\text{H}_{13}\text{BrN}_2\text{NaOS}$   $[\text{M}+\text{Na}]^+$  454.9824, found : 454.9816.

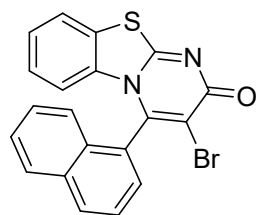

3-bromo-4-(naphthalen-1-yl)-2H-benzo[4,5]thiazolo[3,2-a]pyrimidin-2-one (**3l**)

white solid, m.p. 240-245 °C

59.5 mg, 74%; ethyl acetate/dichloromethane = 1/8,  $R_f$  = 0.4

$^1\text{H}$  NMR (400 MHz,  $\text{DMSO}-d_6$ )  $\delta$  8.30 (d,  $J$  = 6.7 Hz, 1H), 8.15 (d,  $J$  = 7.0 Hz, 1H), 7.98-7.86 (m, 2H), 7.82-7.74 (m, 2H), 7.66-7.50 (m, 2H), 7.27-7.19 (m, 1H), 6.88-6.80 (m, 1H), 5.42 (s, 1H).  $^{13}\text{C}$  NMR (101 MHz,  $\text{DMSO}-d_6$ )  $\delta$  164.8, 162.3, 146.7, 136.0, 133.6, 131.8, 130.3, 130.1, 129.3, 128.5, 128.3, 127.7, 126.9, 126.6, 126.5, 125.0, 124.8, 124.4, 115.4. HRMS (ESI)  $m/z$ : calcd for  $\text{C}_{20}\text{H}_{11}\text{BrN}_2\text{NaOS}$   $[\text{M}+\text{Na}]^+$  428.9668, found : 428.9661.

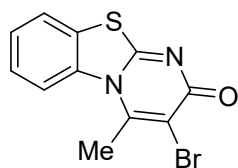

3-bromo-4-methyl-2H-benzo[4,5]thiazolo[3,2-a]pyrimidin-2-one (**3m**)

white solid, m.p. 239-240 °C

41.02 mg, 70%; ethyl acetate/dichloromethane = 1/8,  $R_f$  = 0.5

$^1\text{H}$  NMR (400 MHz,  $\text{CDCl}_3$ )  $\delta$  7.97-7.92 (m, 1H), 7.73-7.67 (m, 1H), 7.53-7.45 (m, 2H), 3.15 (s, 3H).  $^{13}\text{C}$  NMR (101 MHz,  $\text{CDCl}_3$ )  $\delta$  163.5, 162.2, 145.8, 136.4, 127.1, 126.7, 125.1, 123.7, 116.5, 114.9, 22.7. HRMS (ESI)  $m/z$ : calcd for  $\text{C}_{11}\text{H}_7\text{BrN}_2\text{NaOS}$   $[\text{M}+\text{Na}]^+$  316.9355, found : 316.9358.

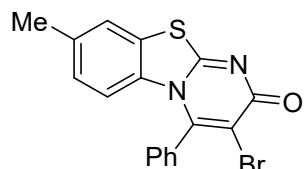

3-bromo-8-methyl-4-phenyl-2H-benzo[4,5]thiazolo[3,2-a]pyrimidin-2-one (**3n**)

white solid, m.p. 265-266 °C

25.8 mg, 35%; ethyl acetate/dichloromethane = 1/8,  $R_f$  = 0.5

$^1\text{H}$  NMR (400 MHz,  $\text{DMSO}-d_6$ )  $\delta$  7.78 (s, 1H), 7.69 (d,  $J$  = 7.5 Hz, 3H), 7.63-7.56 (m, 2H), 6.88 (d,  $J$  = 8.8 Hz, 1H), 5.53 (d,  $J$  = 8.8 Hz, 1H), 2.27 (s, 3H).  $^{13}\text{C}$  NMR (101 MHz,  $\text{DMSO}-d_6$ )  $\delta$  164.1, 162.4, 148.2, 136.5, 134.3, 133.1, 131.5, 130.1, 129.3, 127.7, 124.6, 124.1, 115.8, 113.5, 20.9. HRMS (ESI)  $m/z$ : calcd for  $\text{C}_{17}\text{H}_{12}\text{BrN}_2\text{OS}$   $[\text{M}+\text{H}]^+$  370.9848, found : 370.9848.

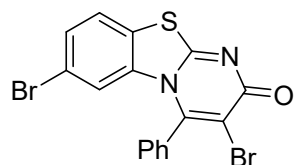

3,7-dibromo-4-phenyl-2H-benzo[4,5]thiazolo[3,2-a]pyrimidin-2-one (**3o**)

white solid, m.p. 236-237 °C

34.6 mg, 40%; ethyl acetate/dichloromethane = 1/8,  $R_f$  = 0.5

$^1\text{H}$  NMR (400 MHz,  $\text{DMSO}-d_6$ )  $\delta$  7.86 (d,  $J$  = 8.4 Hz, 1H), 7.65 (d,  $J$  = 7.4 Hz, 3H), 7.54 (d,  $J$  = 6.6 Hz, 2H), 7.47 (d,  $J$  = 8.4 Hz, 1H), 5.58 (s, 1H).  $^{13}\text{C}$  NMR (101 MHz,  $\text{DMSO}-d_6$ )  $\delta$  164.7, 162.2, 148.0, 137.3, 132.8, 131.6, 130.2, 129.4, 129.1, 125.9, 124.1, 119.3, 119.2, 113.7. HRMS (ESI)  $m/z$ : calcd for  $\text{C}_{16}\text{H}_8\text{Br}_2\text{N}_2\text{NaOS}$   $[\text{M}+\text{Na}]^+$  456.8616, found : 456.8607.

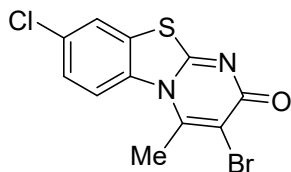

4-bromo-8-chloro-4-methyl-2H-benzo[4,5]thiazolo[3,2-a]pyrimidin-2-one (**3p**)

white solid, m.p. 267-268 °C

45.8 mg, 70%; ethyl acetate/dichloromethane = 1/8,  $R_f$  = 0.5

$^1\text{H}$  NMR (400 MHz, DMSO- $d_6$ )  $\delta$  8.22 (d,  $J$  = 2.4 Hz, 1H), 8.14 (d,  $J$  = 9.2 Hz, 1H), 7.59-7.56 (m, 1H), 3.05 (s, 3H).  $^{13}\text{C}$  NMR (101 MHz, DMSO- $d_6$ )  $\delta$  163.9, 161.8, 148.2, 136.0, 130.8, 127.4, 126.6, 123.8, 119.4, 113.5, 22.8. HRMS (ESI)  $m/z$ : calcd for  $\text{C}_{11}\text{H}_6\text{BrClN}_2\text{NaOS}$   $[\text{M}+\text{Na}]^+$  350.8965, found : 350.8961.

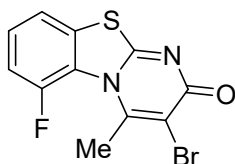

4-bromo-6-fluoro-4-methyl-2H-benzo[4,5]thiazolo[3,2-a]pyrimidin-2-one (**3q**)

white solid, m.p. 250-251 °C

40.3 mg, 65%; ethyl acetate/dichloromethane = 1/8,  $R_f$  = 0.5

$^1\text{H}$  NMR (400 MHz,  $\text{CDCl}_3$ )  $\delta$  7.54-7.41 (m, 2H), 7.30-7.23 (m, 1H), 2.79 (d,  $J$  = 10.9 Hz, 3H)..  $^{13}\text{C}$  NMR (101 MHz,  $\text{CDCl}_3$ )  $\delta$  163.0, 162.2, 150.9, 148.4, 146.7, 128.2 (d,  $J$  = 8.3 Hz), 127.8 (d,  $J$  = 1.8 Hz), 123.2 (d,  $J$  = 11.5 Hz), 119.3 (d,  $J$  = 3.7 Hz), 115.4 (d,  $J$  = 22.9 Hz), 113.4, 23.2 (d,  $J$  = 21.4 Hz).  $^{19}\text{F}$  NMR (377 MHz,  $\text{CDCl}_3$ )  $\delta$  -109.1. HRMS (ESI)  $m/z$ : calcd for  $\text{C}_{11}\text{H}_6\text{BrFN}_2\text{NaOS}$   $[\text{M}+\text{Na}]^+$  334.9260, found : 334.9273.

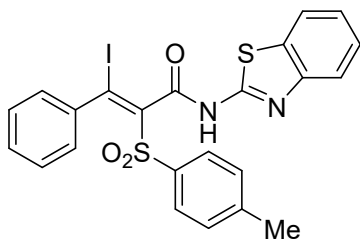

(E)-N-(benzo[d]thiazol-2-yl)-3-iodo-3-phenyl-2-tosylacrylamide (**4a**)

white solid, m.p. 215-216 °C

100.6 mg, 90%; ethyl acetate/petroleum ether = 1/5,  $R_f$  = 0.5

$^1\text{H}$  NMR (400 MHz, DMSO- $d_6$ )  $\delta$  13.48 (s, 1H), 7.97 (d,  $J$  = 7.2 Hz, 1H), 7.76 (d,  $J$  = 7.6 Hz, 1H), 7.44-7.40 (m, 1H), 7.35-7.13 (m, 10H), 6.99 (d,  $J$  = 2.4 Hz, 2H), 2.27 (s,

3H).  $^{13}\text{C}$  NMR (101 MHz,  $\text{DMSO-}d_6$ )  $\delta$  163.5, 158.0, 149.1, 145.5, 145.3, 140.7, 137.5, 132.1, 130.0, 129.6, 128.3, 128.2, 127.0, 126.9, 124.6, 122.4, 121.4, 118.8, 21.6. HRMS (ESI)  $m/z$ : calcd for  $\text{C}_{23}\text{H}_{17}\text{IN}_2\text{NaO}_3\text{S}_2$   $[\text{M}+\text{Na}]^+$  582.9617, found : 582.9610.

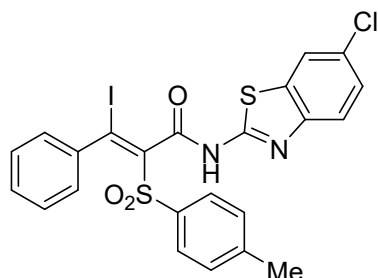

(E)-*N*-(6-chlorobenzothiazol-2-yl)-3-iodo-3-phenyl-2-tosylacrylamide (**4b**)

white solid, m.p. 215-218 °C

85.6 mg, 75%; methanol/dichloromethane = 1/50,  $R_f$  = 0.5

$^1\text{H}$  NMR (400 MHz,  $\text{CDCl}_3$ )  $\delta$  7.95-7.89 (m, 2H), 7.49-7.43 (m, 3H), 7.28-7.26 (m, 1H), 7.23-7.16 (m, 4H), 6.77 (d,  $J$  = 7.0 Hz, 2H), 2.39 (s, 3H).  $^{13}\text{C}$  NMR (101 MHz,  $\text{CDCl}_3$ )  $\delta$  162.6, 159.4, 146.6, 146.0, 145.4, 139.7, 136.7, 133.4, 130.2, 129.9, 129.6, 128.6, 127.8, 127.6, 126.9, 122.6, 121.2, 117.6, 21.8. HRMS (ESI)  $m/z$ : calcd for  $\text{C}_{23}\text{H}_{17}\text{ClIN}_2\text{O}_3\text{S}_2$   $[\text{M}+\text{H}]^+$  594.9408, found : 594.9405.

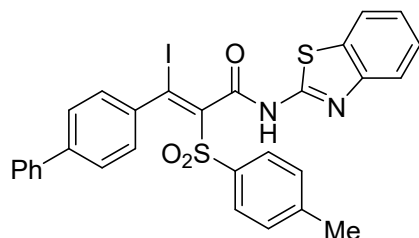

(E)-3-([1,1'-biphenyl]-4-yl)-*N*-(benzo[d]thiazol-2-yl)-3-iodo-2-tosylacrylamide (**4c**)

white solid, m.p. 206-209 °C

69.9 mg, 55%; ethyl acetate/petroleum ether = 1/5,  $R_f$  = 0.6

$^1\text{H}$  NMR (400 MHz,  $\text{DMSO-}d_6$ )  $\delta$  13.50 (s, 1H), 7.98 (d,  $J$  = 7.9 Hz, 1H), 7.77 (d,  $J$  = 7.9 Hz, 1H), 7.62 (d,  $J$  = 7.7 Hz, 2H), 7.52 (d,  $J$  = 8.0 Hz, 2H), 7.43 (t,  $J$  = 7.5 Hz, 3H), 7.37-7.28 (m, 4H), 7.18 (d,  $J$  = 8.1 Hz, 2H), 7.08 (d,  $J$  = 8.0 Hz, 2H), 2.27 (s, 3H).  $^{13}\text{C}$  NMR (101 MHz,  $\text{DMSO-}d_6$ )  $\delta$  163.5, 158.0, 149.1, 145.7, 145.3, 141.4, 139.7, 139.7, 137.5, 132.2, 130.0, 129.5, 128.47, 128.4, 127.8, 127.3, 126.9, 126.5, 124.6, 122.4, 121.5, 118.3, 21.7. HRMS (ESI)  $m/z$ : calcd for  $\text{C}_{29}\text{H}_{20}\text{IN}_2\text{O}_3\text{S}_2$   $[\text{M}-\text{H}]^-$  634.9967, found : 634.9966.

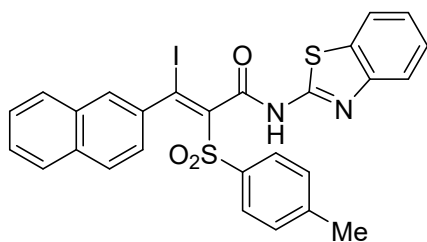

(E)-N-(benzo[d]thiazol-2-yl)-3-iodo-3-(naphthalen-2-yl)-2-tosylacrylamide (**4d**)

white solid, m.p. 250-251 °C

69.8 mg, 53%; petroleum ether/ethyl acetate = 1/5,  $R_f$  = 0.5

$^1\text{H}$  NMR (400 MHz,  $\text{DMSO-}d_6$ )  $\delta$  13.77 (s, 1H), 8.01 (d,  $J$  = 7.9 Hz, 1H), 7.84-7.78 (m, 3H), 7.67 (s, 1H), 7.46-7.40 (m, 3H), 7.36-7.30 (m, 2H), 7.17 (d,  $J$  = 5.7 Hz, 1H), 7.05 (d,  $J$  = 7.8 Hz, 2H), 6.82 (d,  $J$  = 8.0 Hz, 2H), 2.04 (s, 3H).  $^{13}\text{C}$  NMR (101 MHz,  $\text{DMSO-}d_6$ )  $\delta$  163.4, 158.1, 149.1, 147.8, 144.9, 136.7, 136.3, 133.4, 132.1, 130.2, 129.5, 128.5, 128.3, 128.1, 127.0, 126.8, 126.3, 125.3, 124.7, 124.6, 122.5, 121.5, 116.1, 21.4. HRMS (ESI)  $m/z$ : calcd for  $\text{C}_{27}\text{H}_{19}\text{IN}_2\text{NaO}_3\text{S}_2$   $[\text{M}+\text{Na}]^+$  632.9774, found : 632.9767.

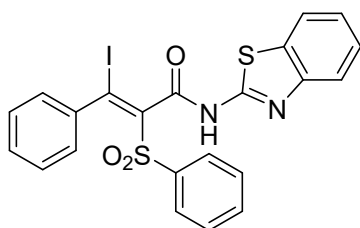

(E)-N-(benzo[d]thiazol-2-yl)-3-iodo-3-phenyl-2-(phenylsulfonyl)acrylamide (**4e**)

white solid, m.p. 188-189 °C

80.6 mg, 74%; petroleum ether/ethyl acetate = 1/5,  $R_f$  = 0.5

$^1\text{H}$  NMR (400 MHz,  $\text{DMSO-}d_6$ )  $\delta$  13.53 (s, 1H), 8.00 (d,  $J$  = 7.8 Hz, 1H), 7.78 (d,  $J$  = 7.9 Hz, 1H), 7.61-7.58 (m, 1H), 7.46-7.39 (m, 5H), 7.34-7.30 (m, 1H), 7.25-7.20 (m, 3H), 6.99-6.97 (m, 2H).  $^{13}\text{C}$  NMR (101 MHz,  $\text{DMSO-}d_6$ )  $\delta$  163.4, 157.9, 151.4, 149.0, 145.3, 140.6, 140.3, 134.6, 132.1, 129.7, 129.7, 129.6, 129.6, 128.3, 128.3, 128.2, 128.2, 127.0, 127.0, 124.6, 124.6, 122.5, 122.5, 121.5, 121.5, 119.3. HRMS (ESI)  $m/z$ : calcd for  $\text{C}_{22}\text{H}_{16}\text{IN}_2\text{O}_3\text{S}_2$   $[\text{M}+\text{H}]^+$  546.9642, found: 546.9647.

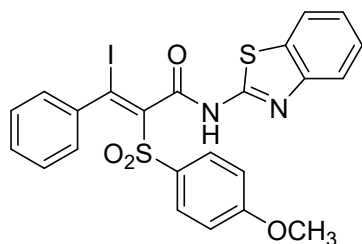

(E)-N-(benzo[d]thiazol-2-yl)-3-iodo-2-((4-methoxyphenyl)sulfonyl)-3-phenylacrylamide (**4f**)

white solid, m.p. 203-205 °C

86.2 mg, 75%; methanol/dichloromethane = 1/50,  $R_f$  = 0.5

$^1\text{H}$  NMR (400 MHz,  $\text{CDCl}_3$ )  $\delta$  8.04-8.01 (m, 1H), 7.93-7.91 (m, 1H), 7.55-7.40 (m, 4H), 7.29-7.25 (m, 3H), 7.21 (t,  $J$  = 7.5 Hz, 2H), 6.83-6.80 (m, 4H), 3.84 (s, 3H).  $^{13}\text{C}$  NMR (101 MHz,  $\text{CDCl}_3$ )  $\delta$  164.09, 158.5, 146.5, 139.9, 131.1, 130.9, 129.7, 127.8, 126.9, 126.9, 124.6, 121.5, 114.2, 55.7. HRMS (ESI)  $m/z$ : calcd for  $\text{C}_{23}\text{H}_{18}\text{IN}_2\text{O}_4\text{S}_2$   $[\text{M}+\text{H}]^+$  576.9747, found: 576.9742.

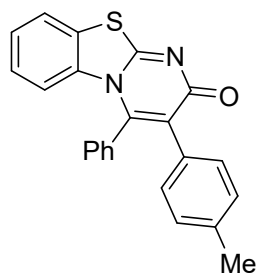

4-phenyl-3-(p-tolyl)-2H-benzo[4,5]thiazolo[3,2-a]pyrimidin-2-one (**5**)

white solid, m.p. 250-253 °C

62.5 mg, 85%; petroleum ether/ethyl acetate = 1/1,  $R_f$  = 0.4

$^1\text{H}$  NMR (400 MHz,  $\text{CDCl}_3$ )  $\delta$  7.61 (dd,  $J$  = 7.9, 1.3 Hz, 1H), 7.48-7.37 (m, 3H), 7.28-7.24 (m, 3H), 7.01-6.93 (m, 5H), 5.83 (d,  $J$  = 8.5 Hz, 1H), 2.23 (s, 3H).  $^{13}\text{C}$  NMR (101 MHz,  $\text{CDCl}_3$ )  $\delta$  166.6, 163.8, 145.8, 137.0, 136.2, 131.4, 130.5, 130.2, 129.8, 129.4, 129.2, 128.5, 126.2, 125.8, 124.5, 124.5, 122.9, 116.6, 21.3. HRMS (ESI)  $m/z$ : calcd for  $\text{C}_{23}\text{H}_{16}\text{N}_2\text{NaOS}$   $[\text{M}+\text{Na}]^+$  391.0876, found: 391.0875.

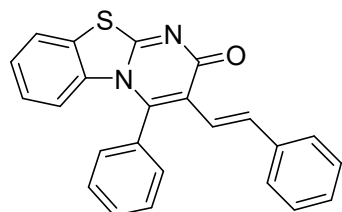

(E)-4-phenyl-3-styryl-2H-benzo[4,5]thiazolo[3,2-a]pyrimidin-2-one (**6**)

white solid, m.p. 236-238 °C

54.0 mg, 71%; methanol/dichloromethane = 1/50,  $R_f$  = 0.45

$^1\text{H}$  NMR (400 MHz,  $\text{CDCl}_3$ )  $\delta$  8.29 (d,  $J$  = 16.1 Hz, 1H), 7.79-7.69 (m, 3H), 7.63 (dd,  $J$  = 7.9, 1.5 Hz, 1H), 7.53-7.50 (m, 2H), 7.31-7.29 (m, 1H), 7.28-7.25 (m, 4H), 7.23-7.19 (m, 1H), 7.03-6.98 (m, 1H), 6.55 (d,  $J$  = 16.1 Hz, 1H), 5.86 (d,  $J$  = 8.7 Hz, 1H).

$^{13}\text{C}$  NMR (101 MHz,  $\text{CDCl}_3$ )  $\delta$  165.8, 161.9, 145.4, 137.9, 136.1, 135.9, 131.4, 131.0, 130.0, 129.8, 128.5, 127.9, 126.8, 126.3, 125.9, 124.5, 123.0, 119.9, 118.2, 116.5.

HRMS (ESI)  $m/z$ : calcd for  $\text{C}_{24}\text{H}_{17}\text{N}_2\text{OS}$   $[\text{M}+\text{H}]^+$  381.1062, found: 381.1069.

## 5. $^1\text{H}$ , $^{13}\text{C}$ and $^{19}\text{F}$ NMR of Compounds 3, 4, 5, 6.

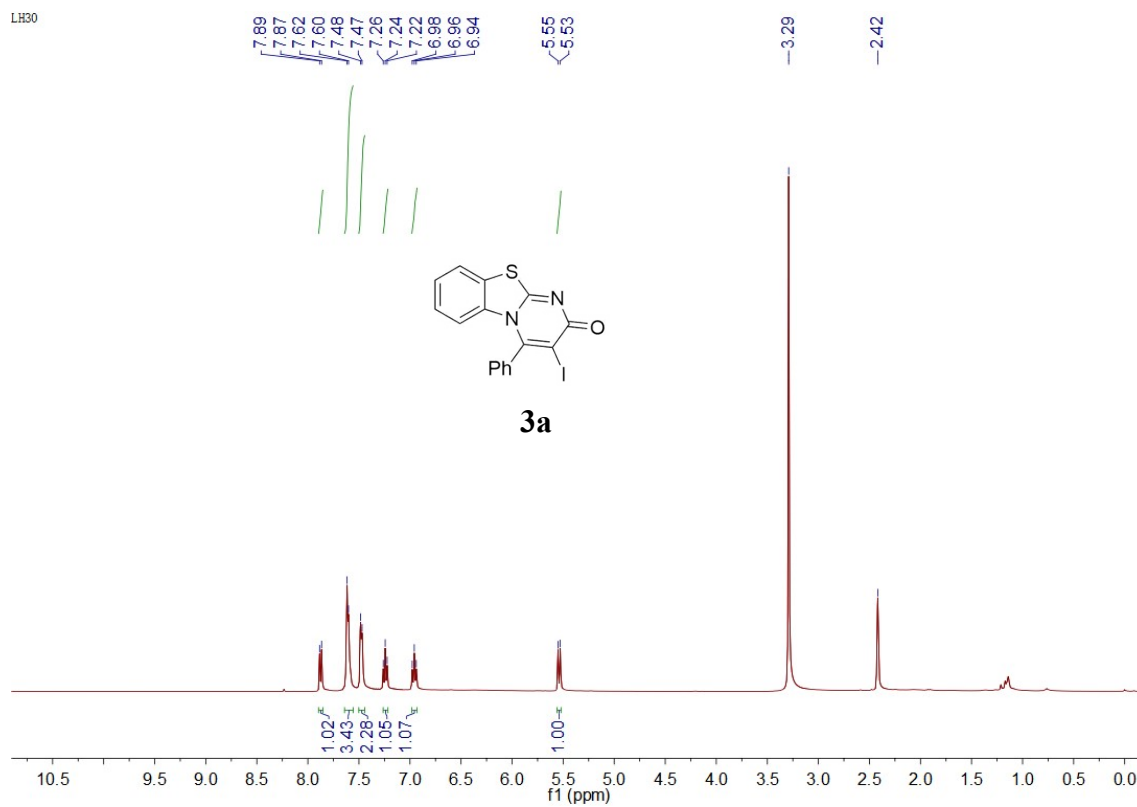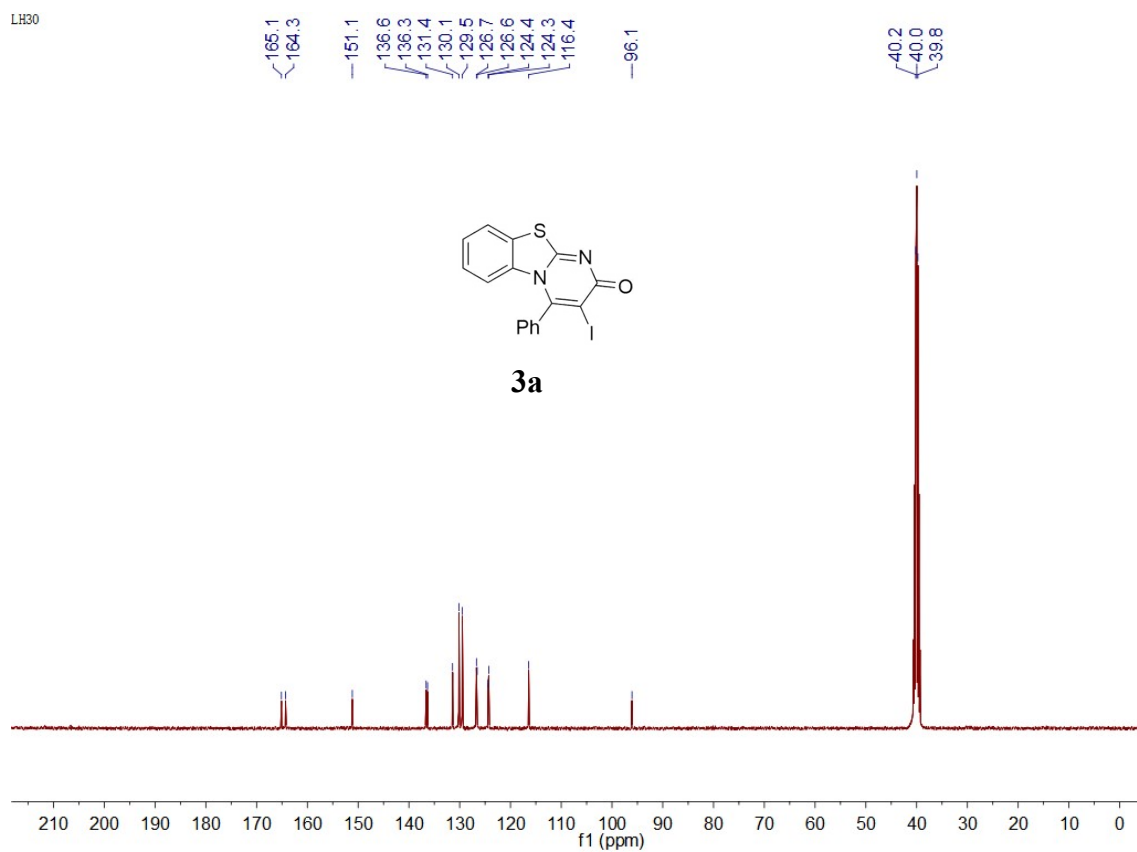



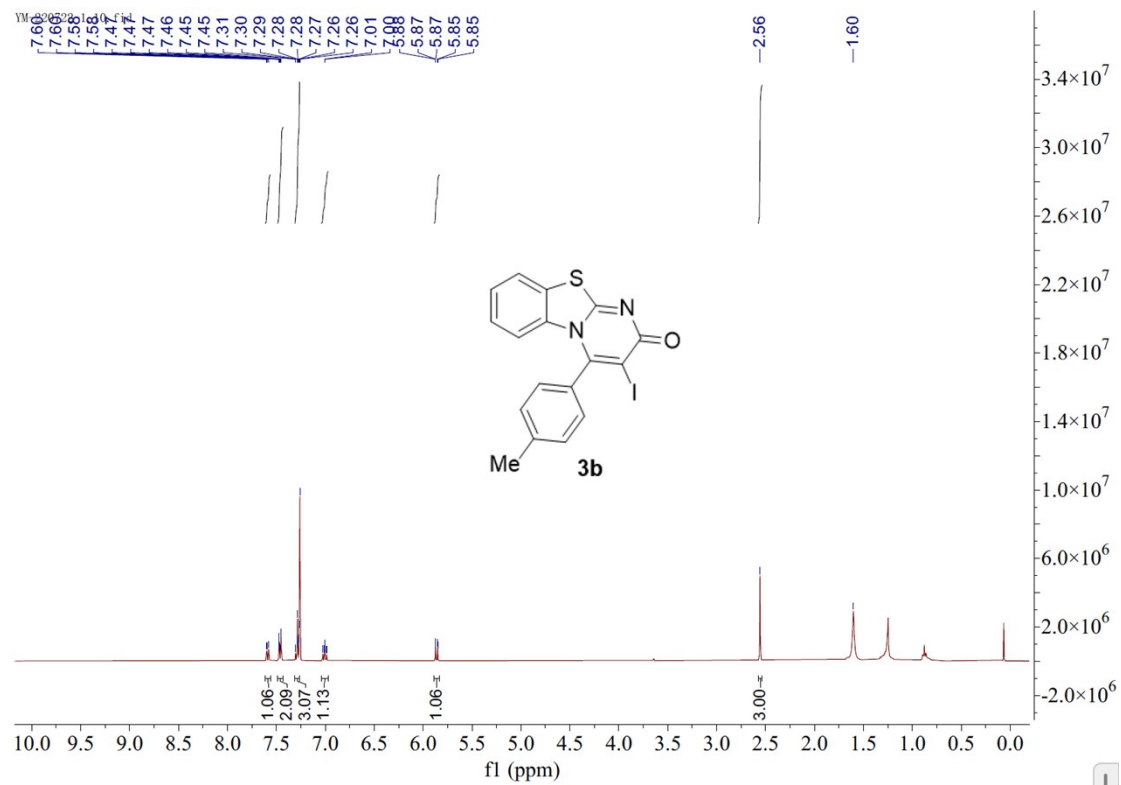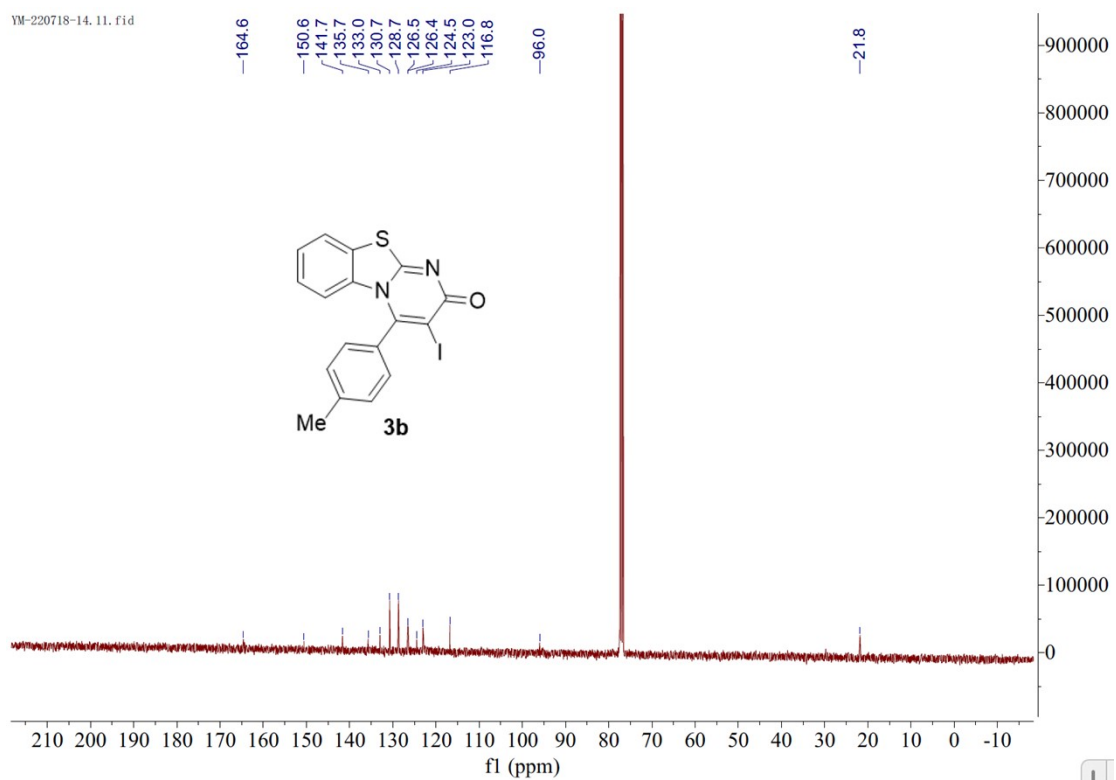

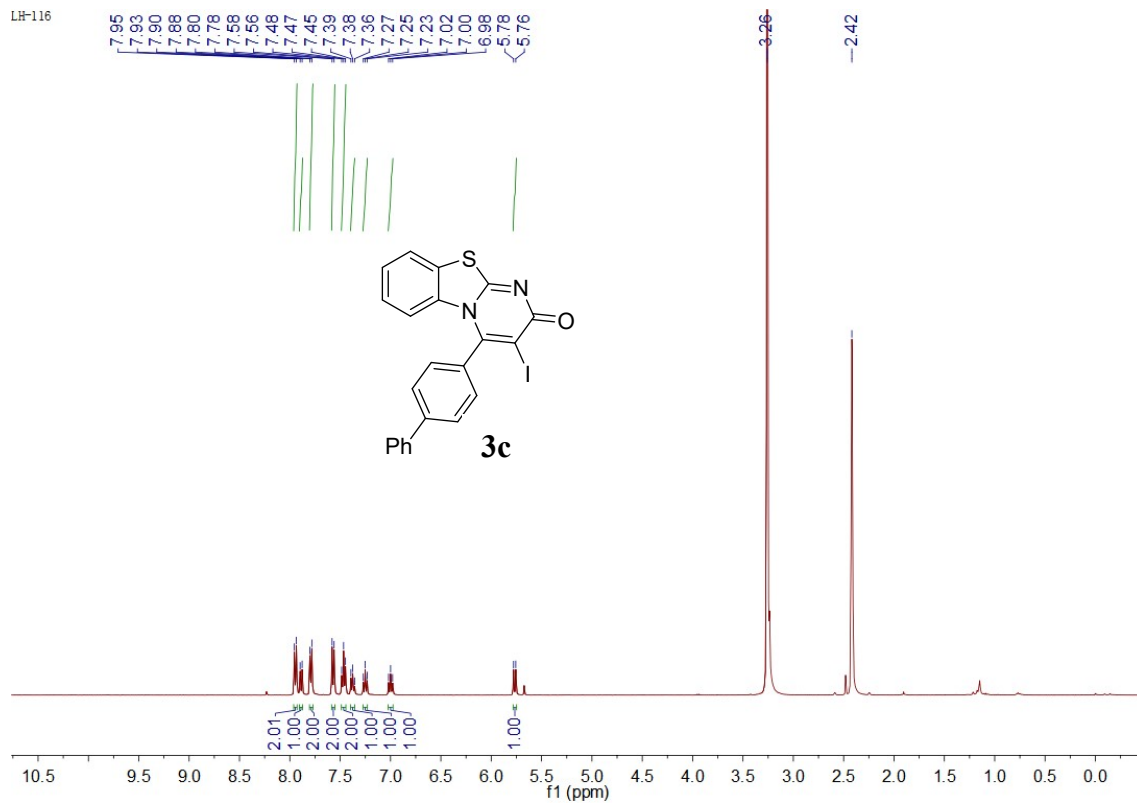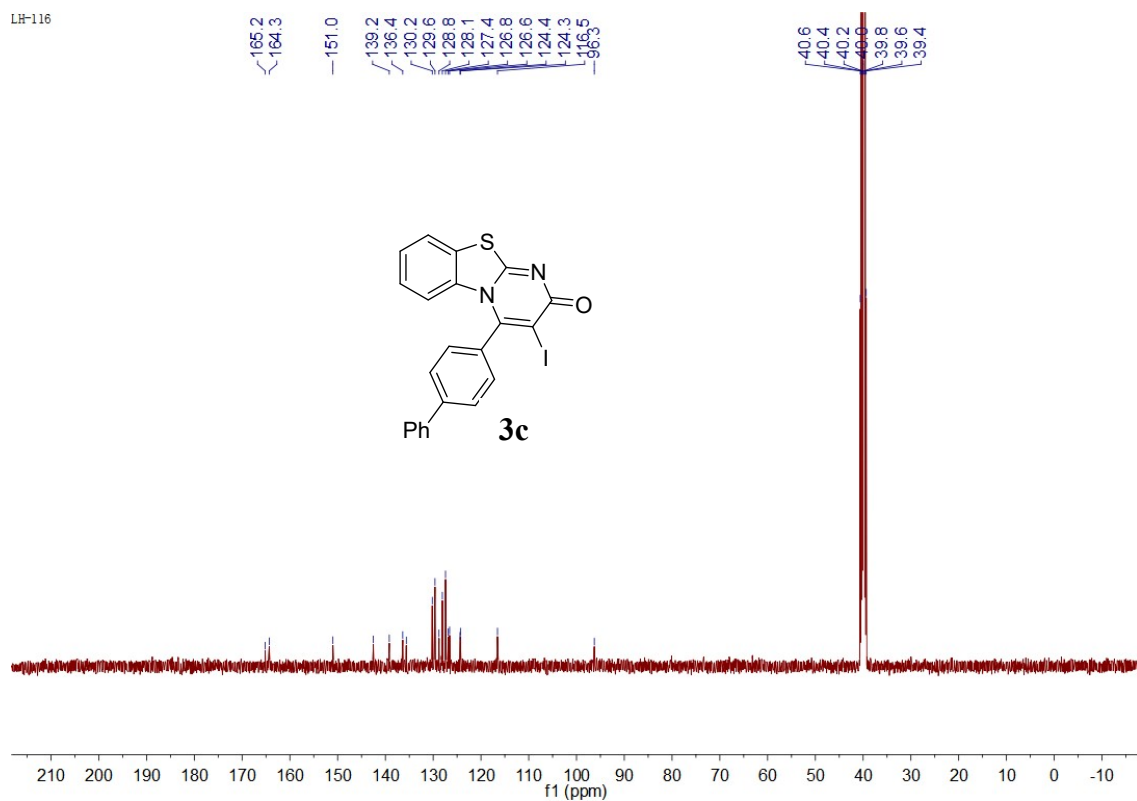

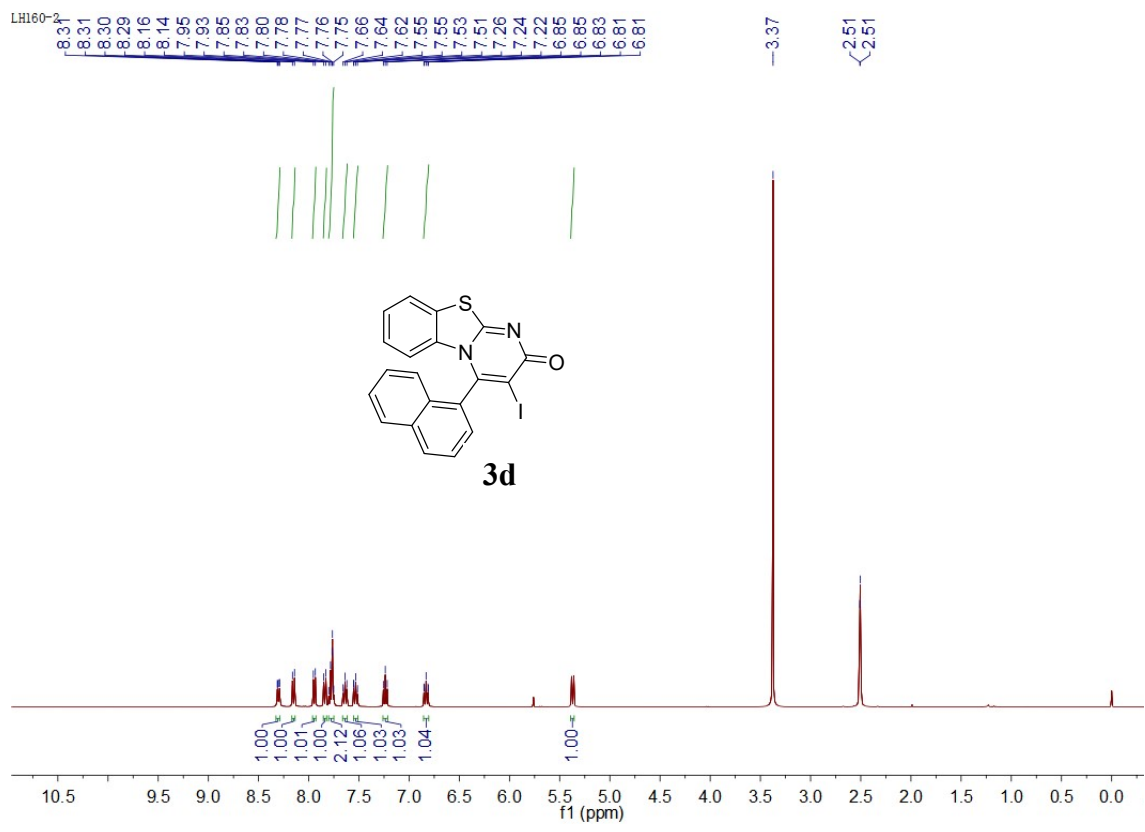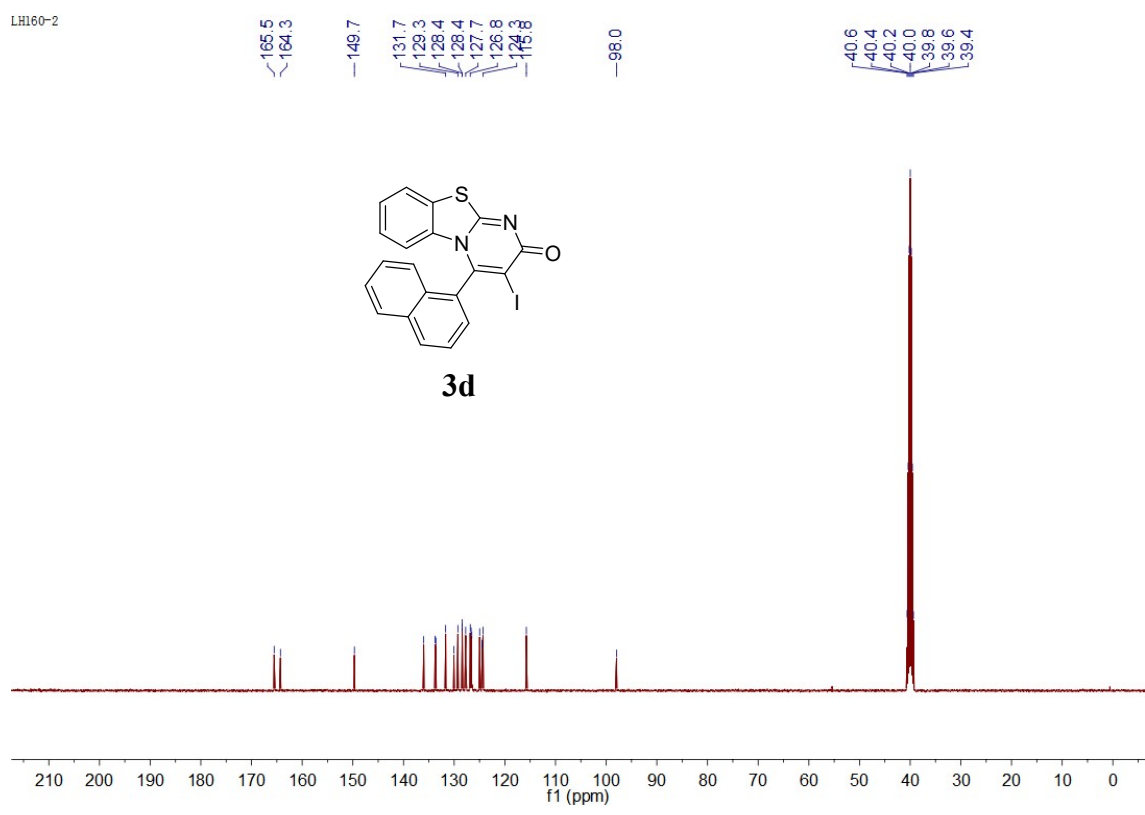

LH247

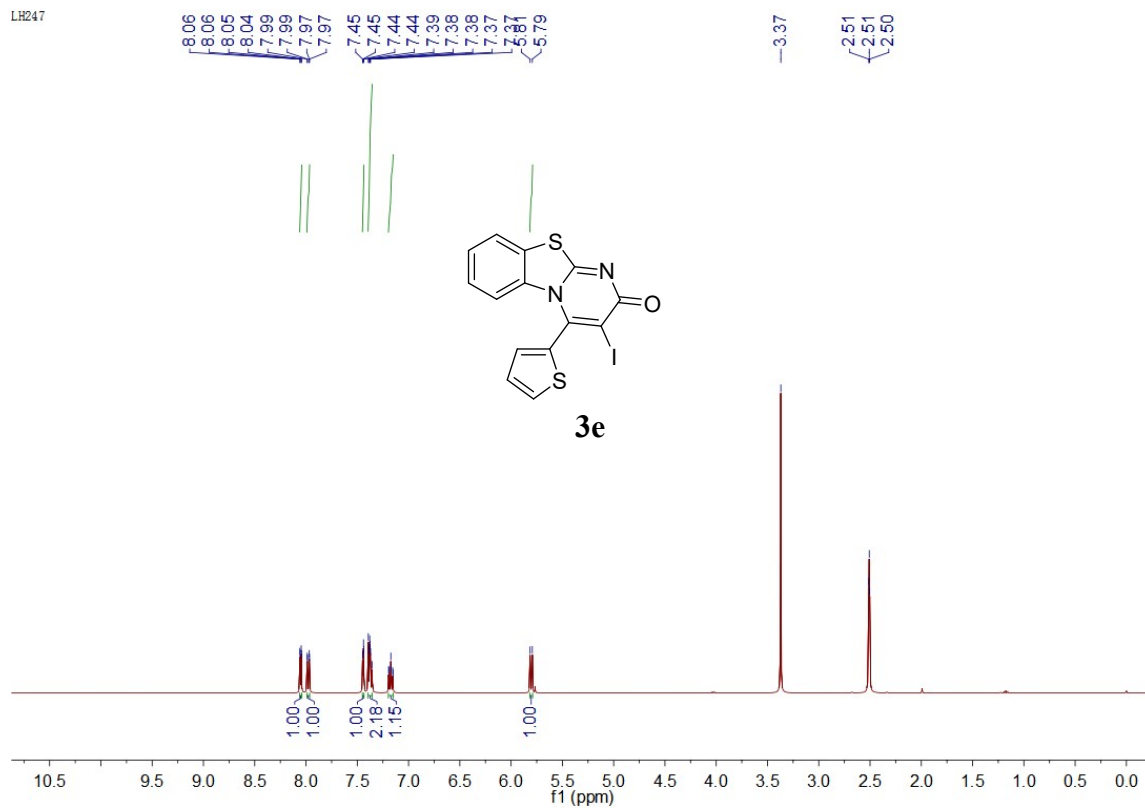

LH247

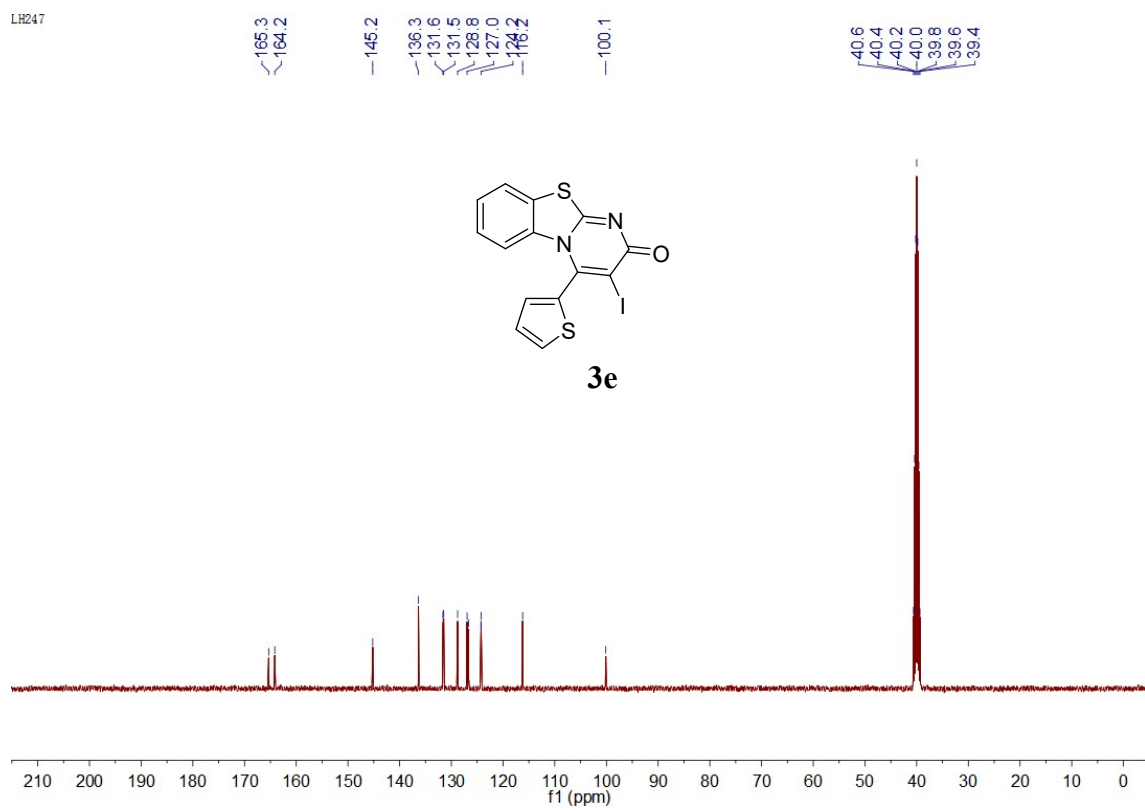

LH79

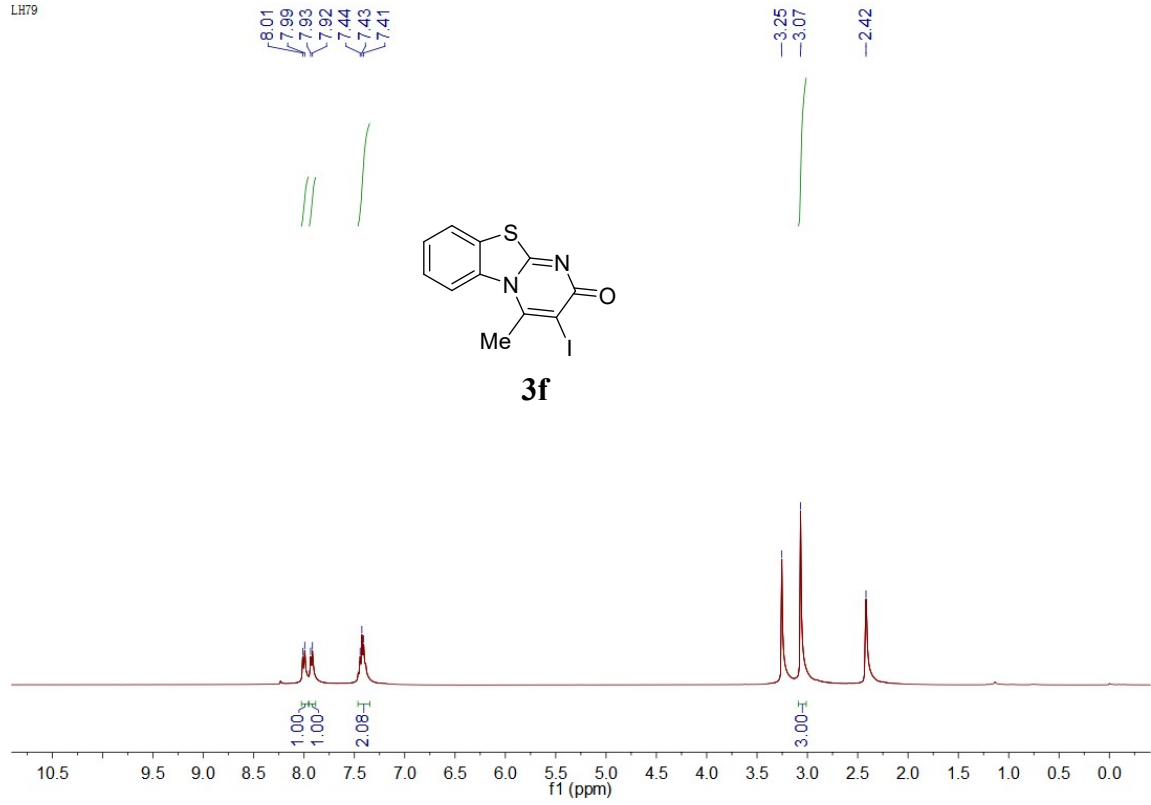

LH79

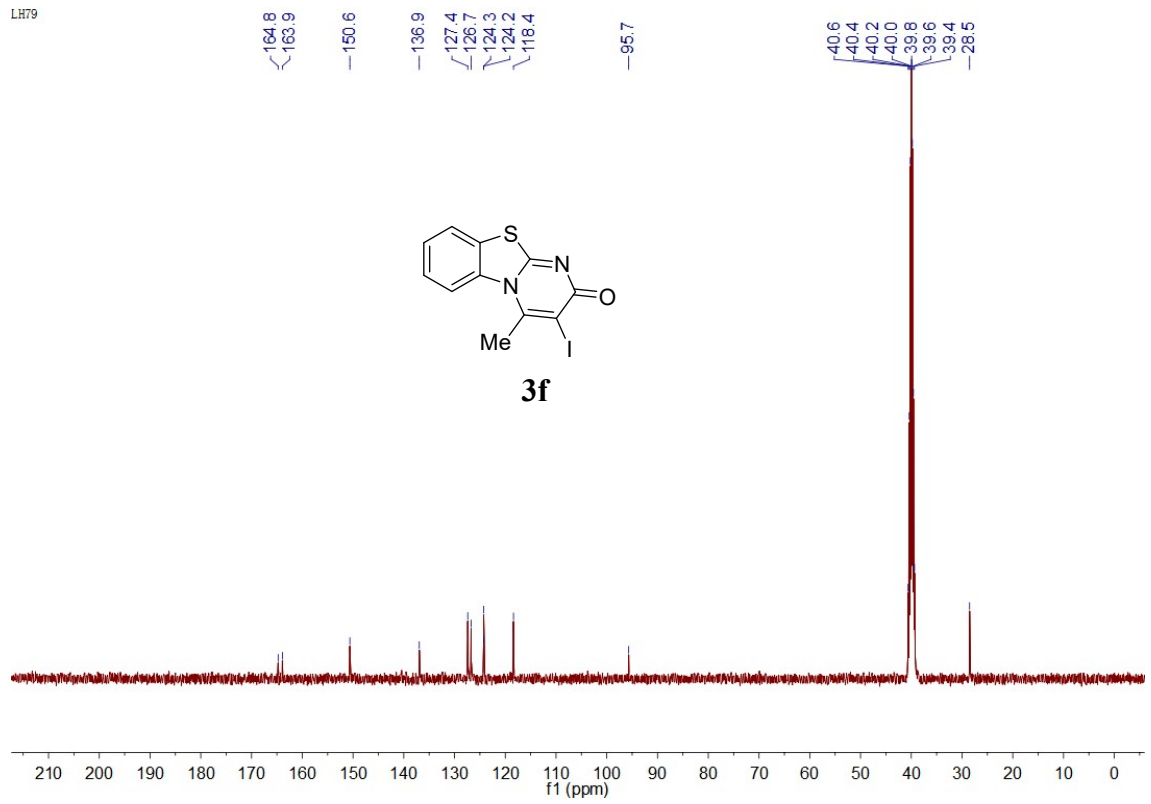

LH73-2

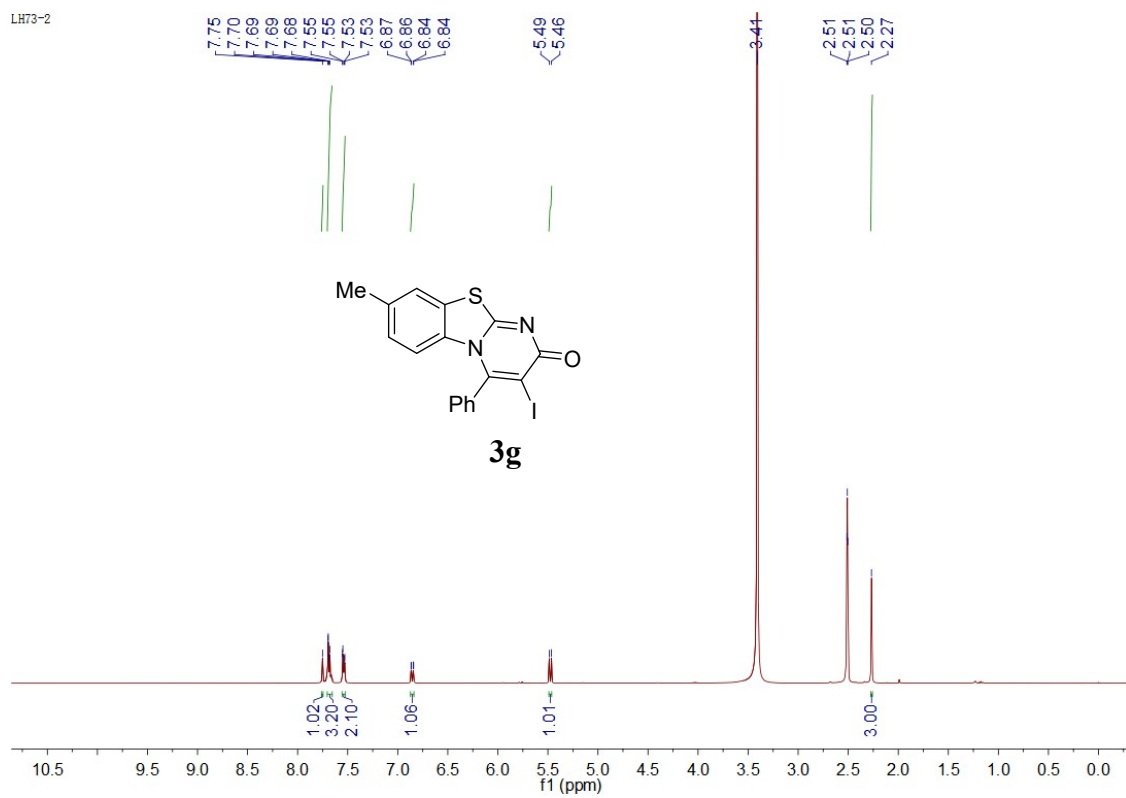

LH73-2

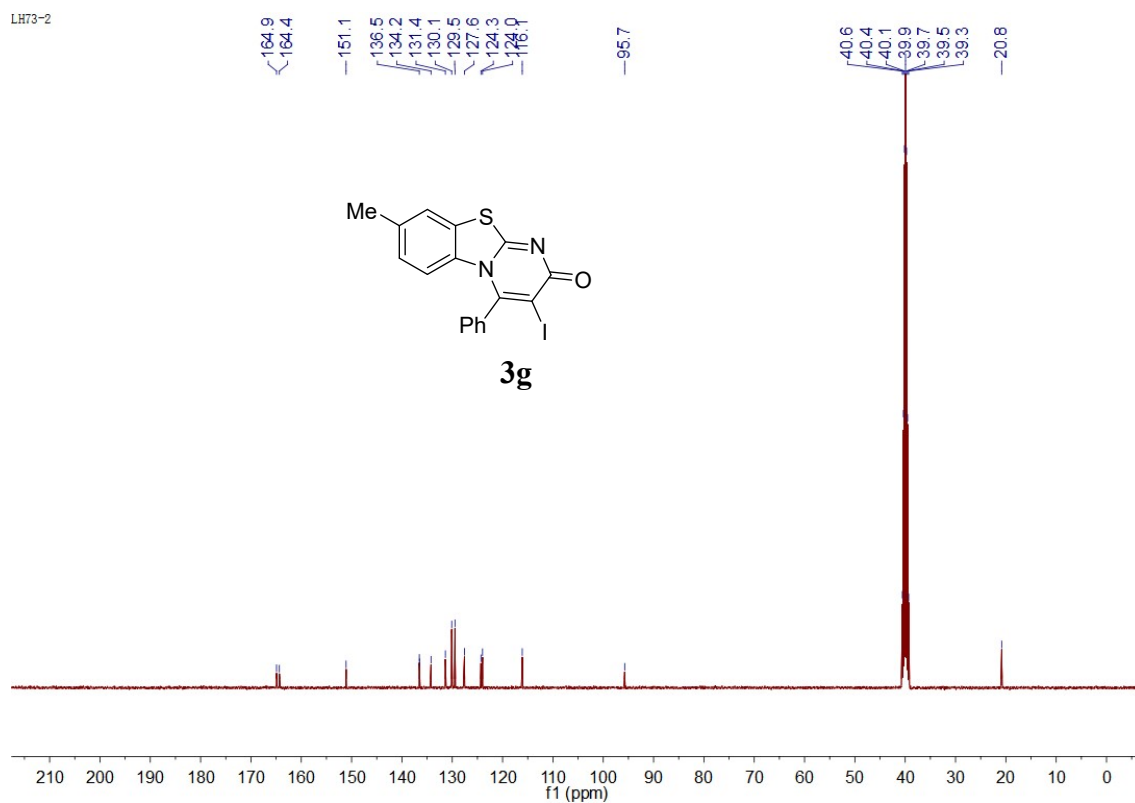

LH-114

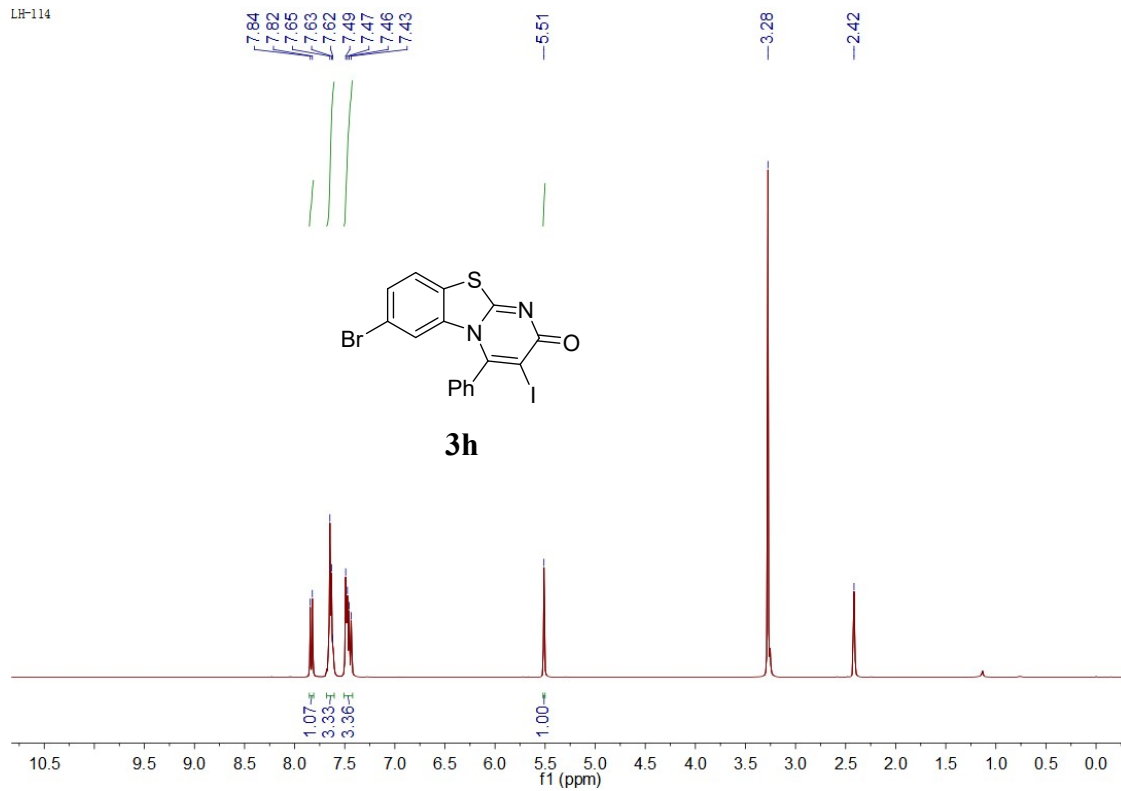

LH-114

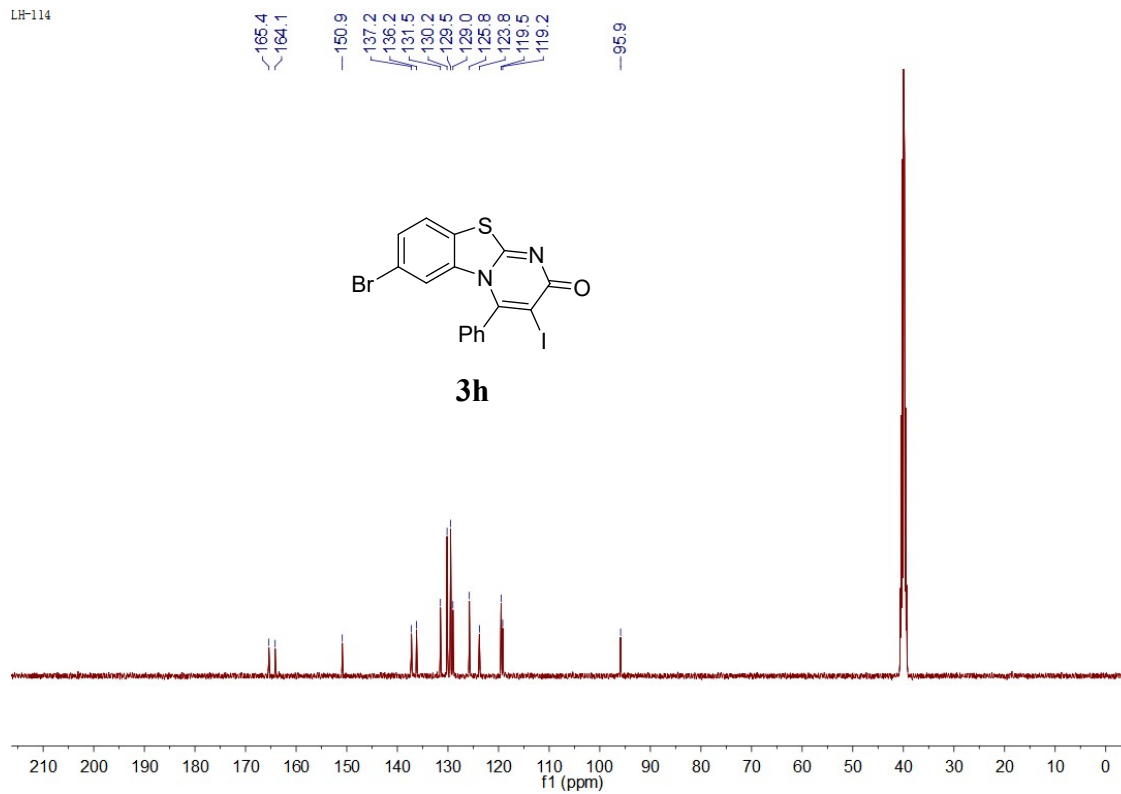

LH238

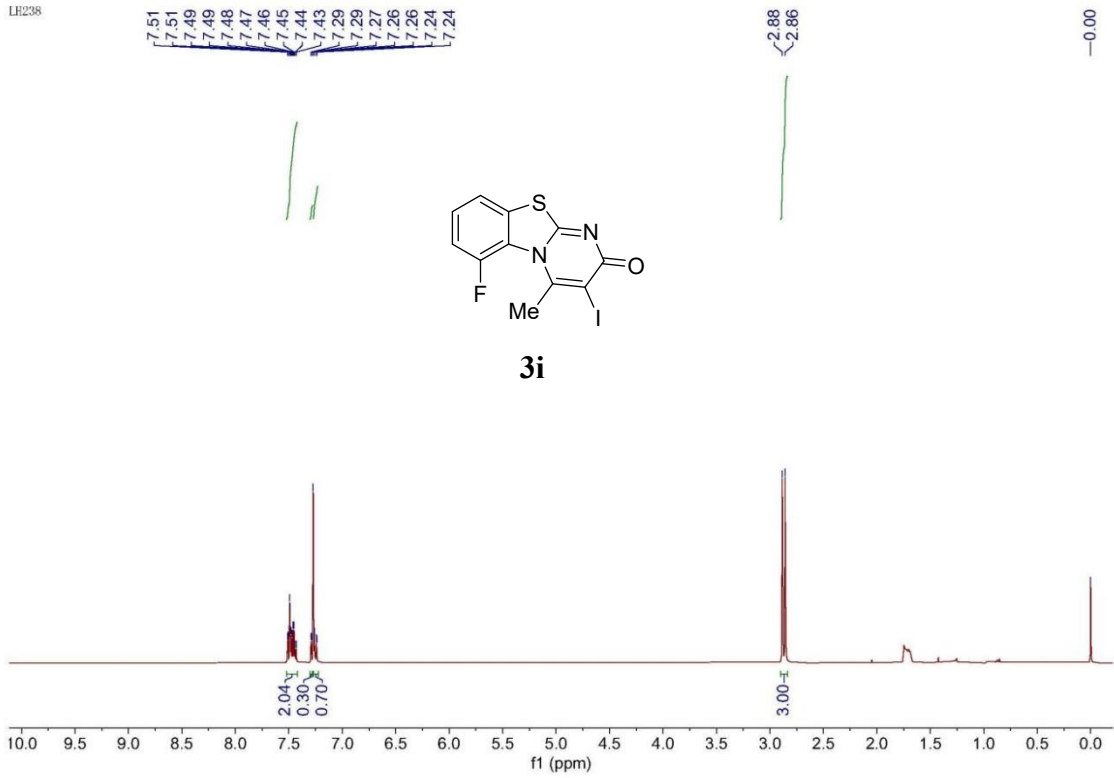

LH238

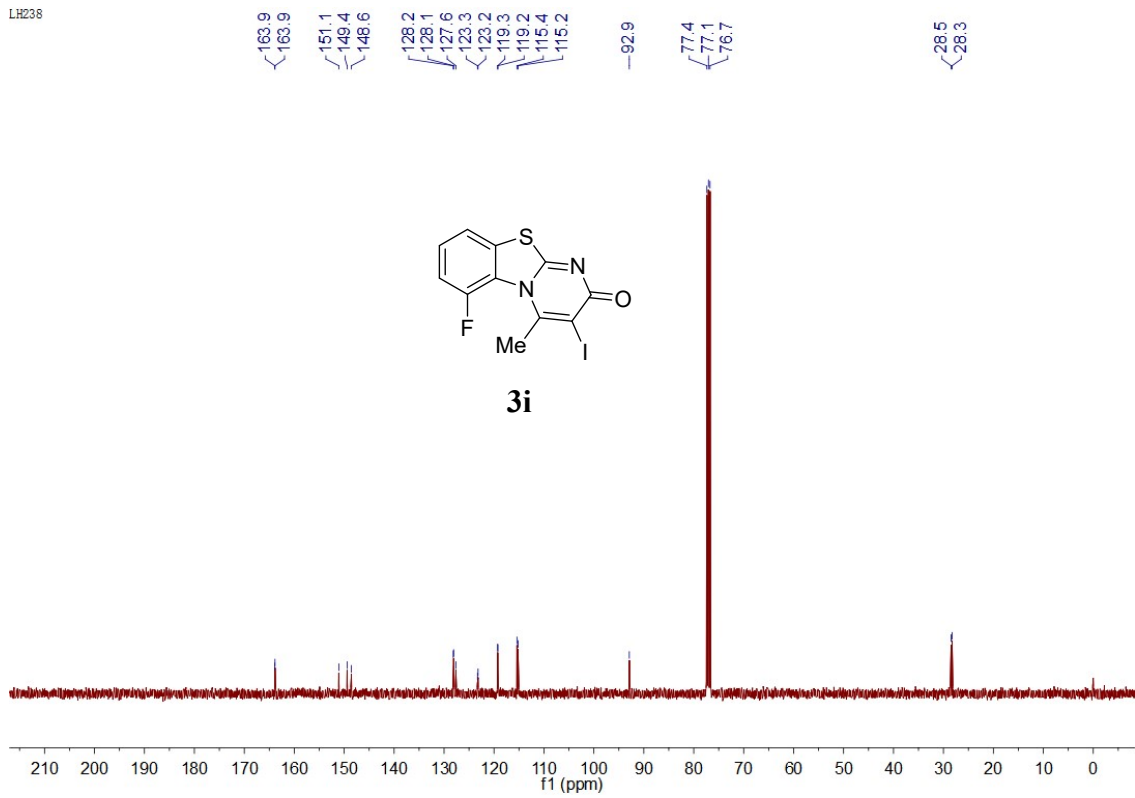



LH83

--109.4

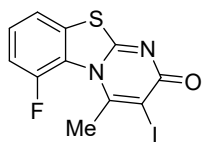

**3i**

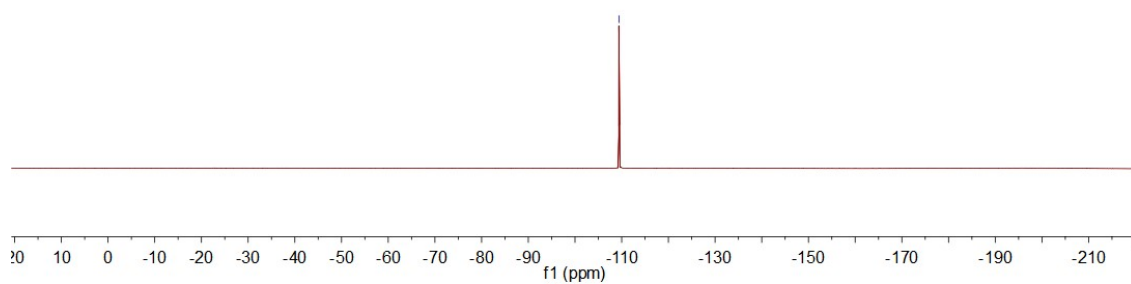

LH24

7.91  
7.89  
7.64  
7.62  
7.61  
7.59  
7.58  
7.54  
7.54  
7.53  
7.52  
7.28  
7.26  
7.24  
7.00  
6.98  
6.96  
5.61  
5.59  
-3.29  
-2.42  
-2.42

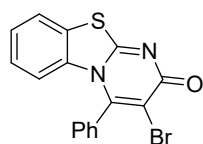

**3j**

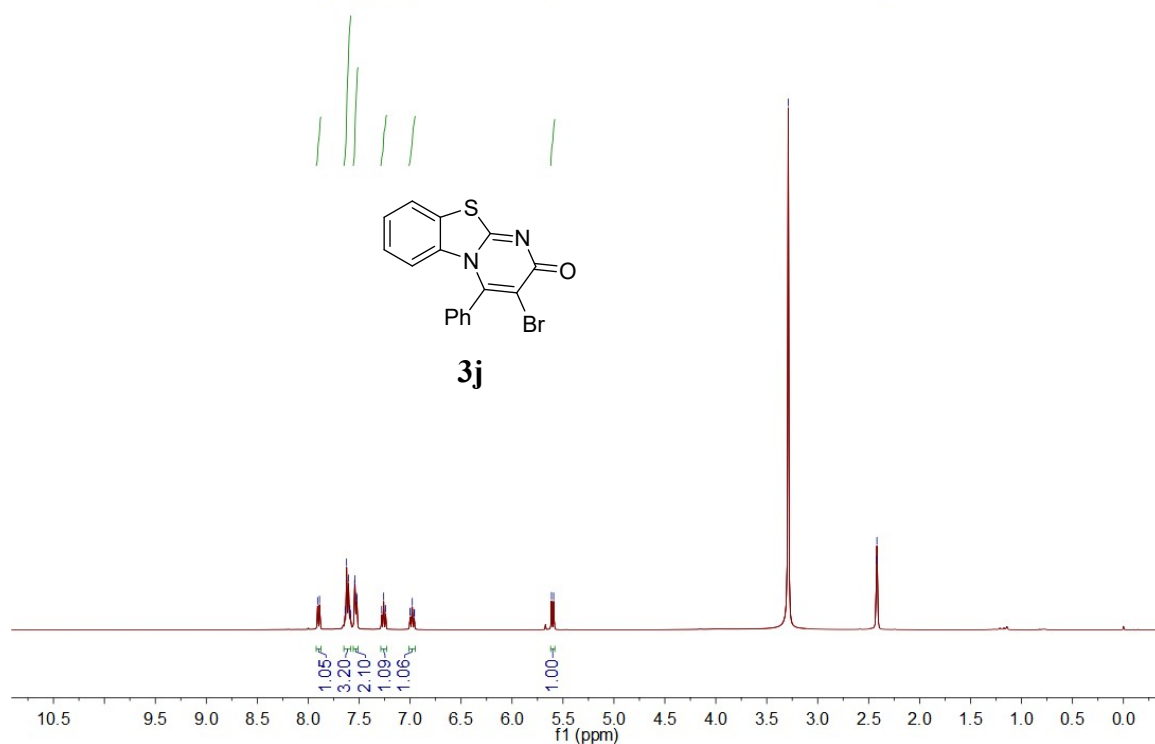

LH24

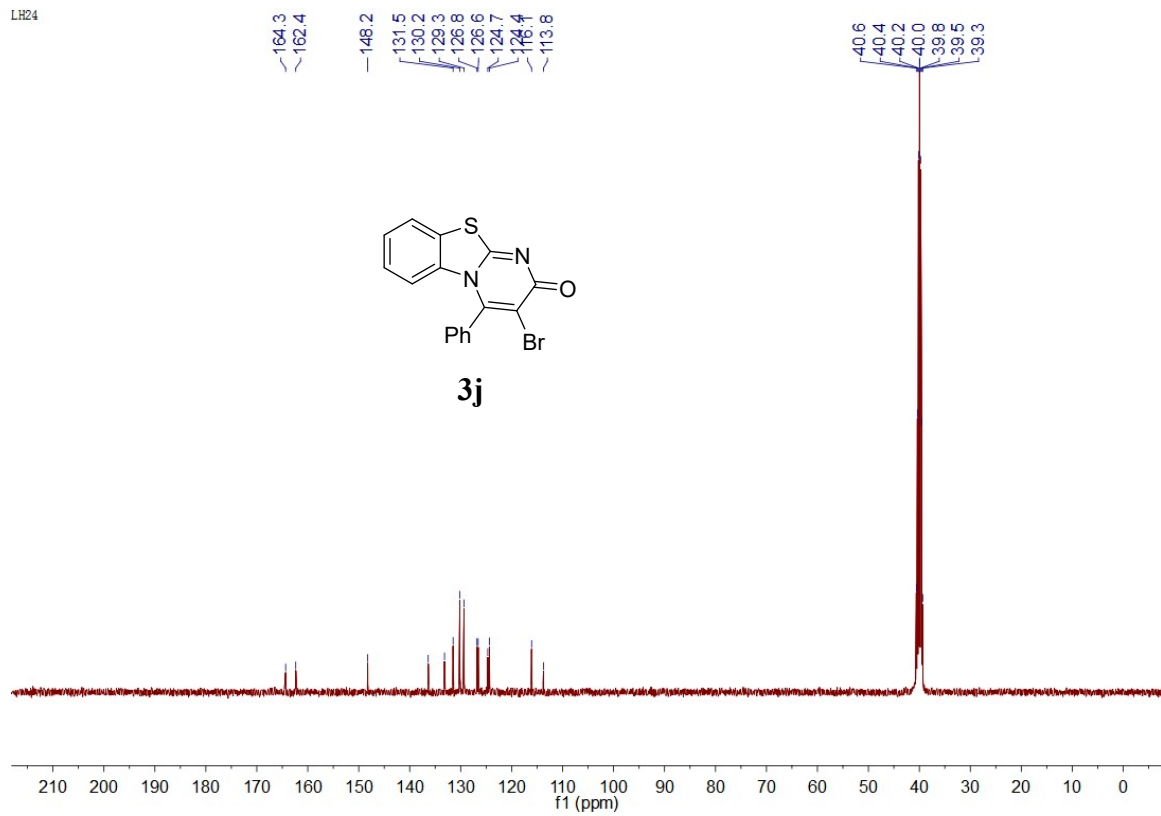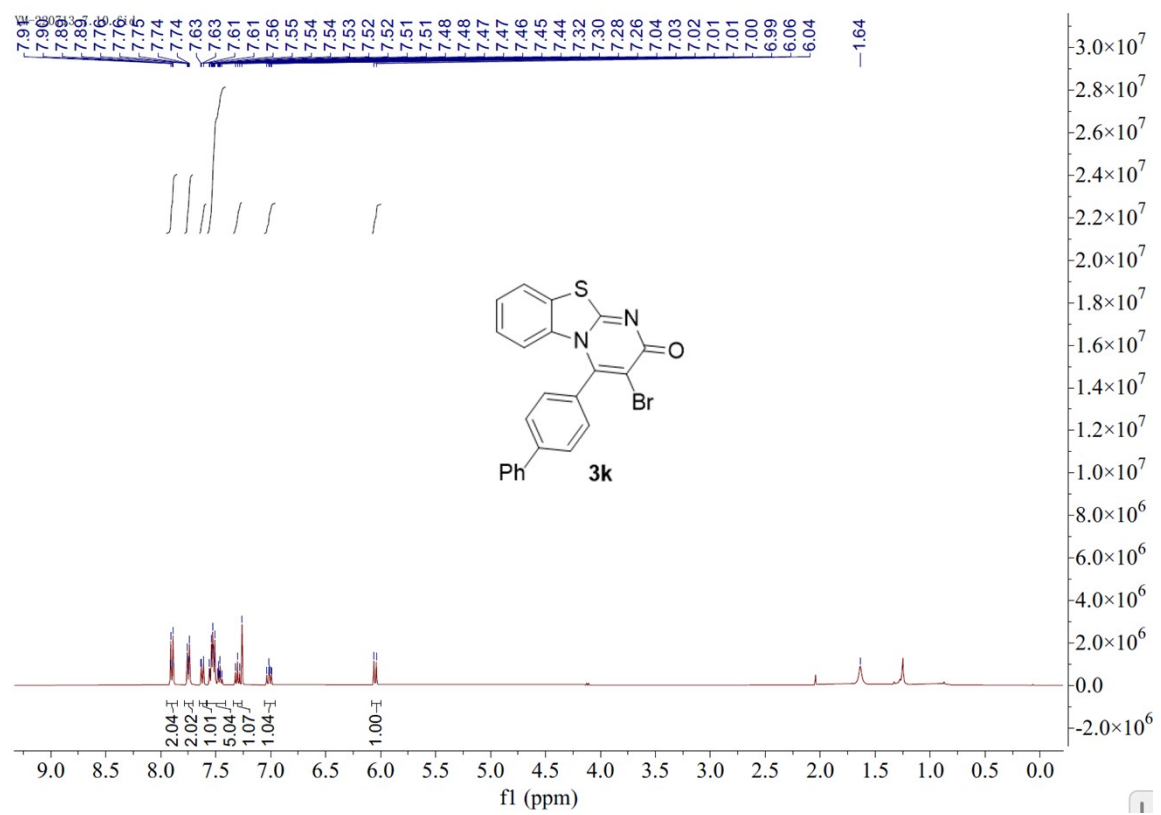

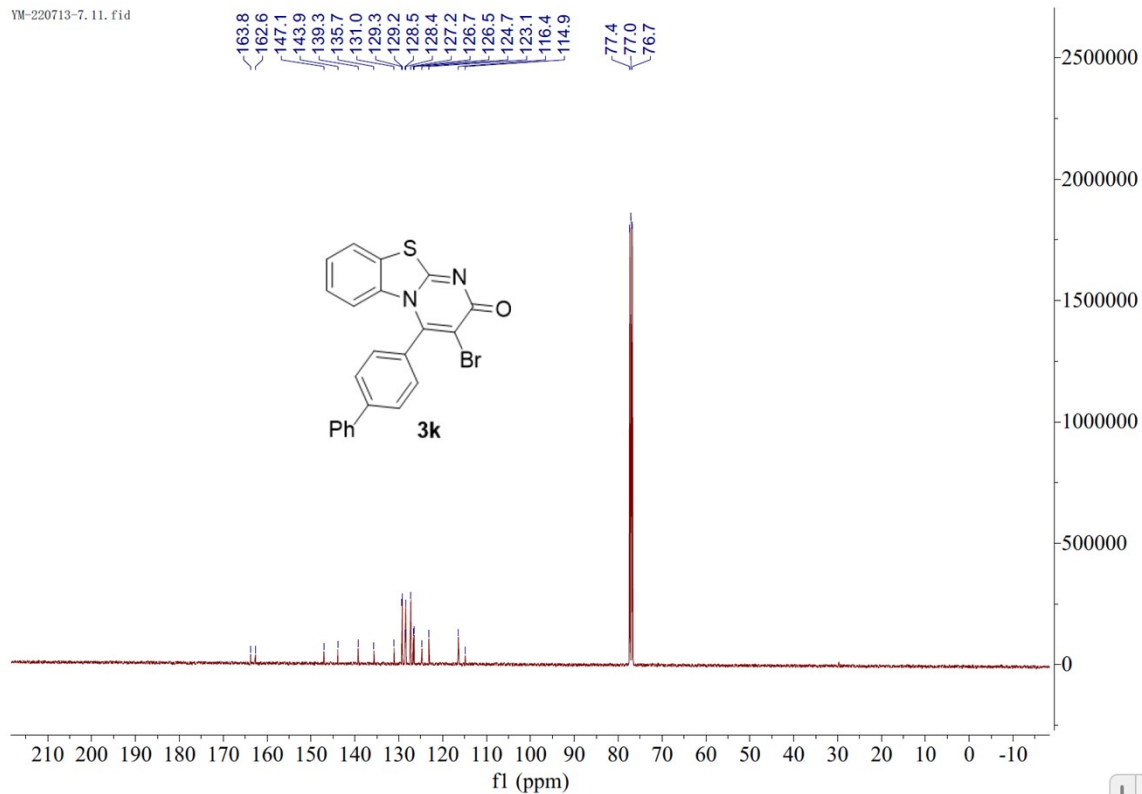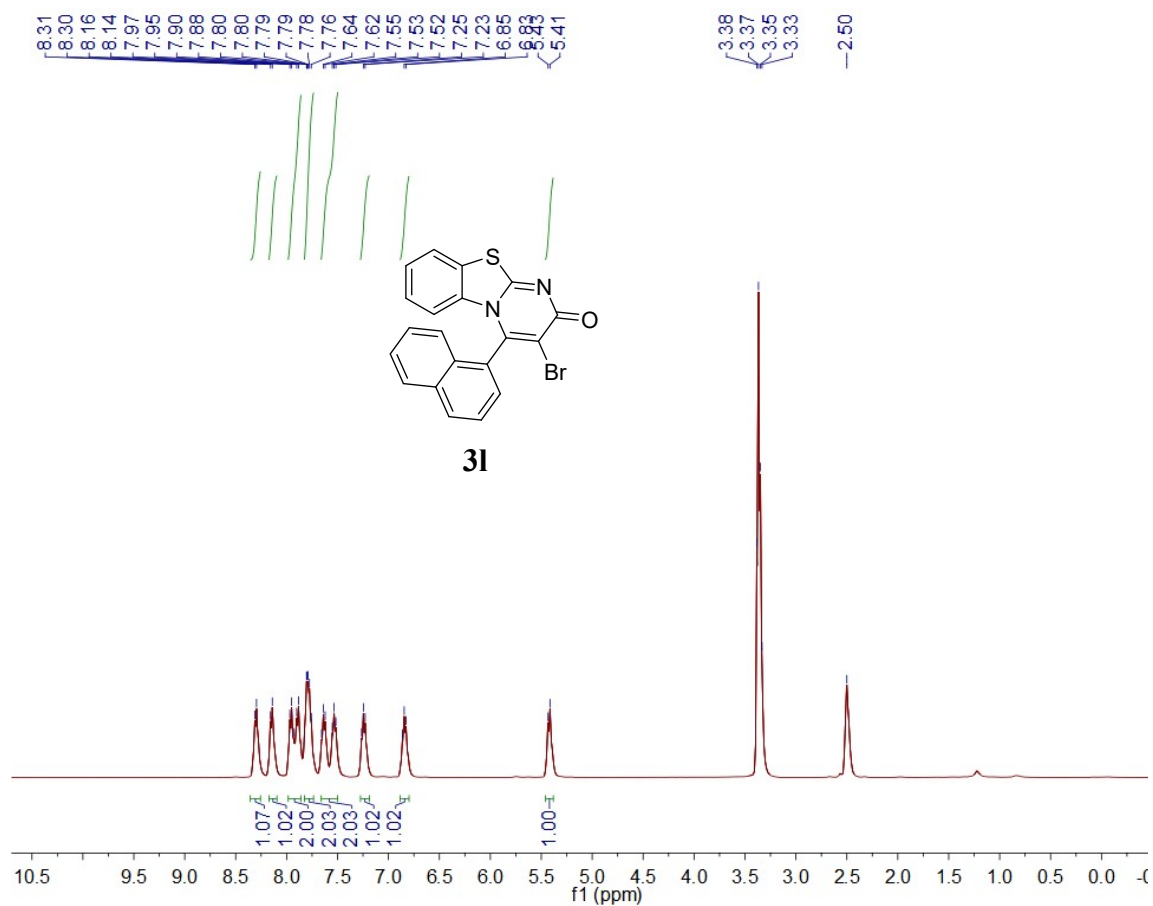

LH-115

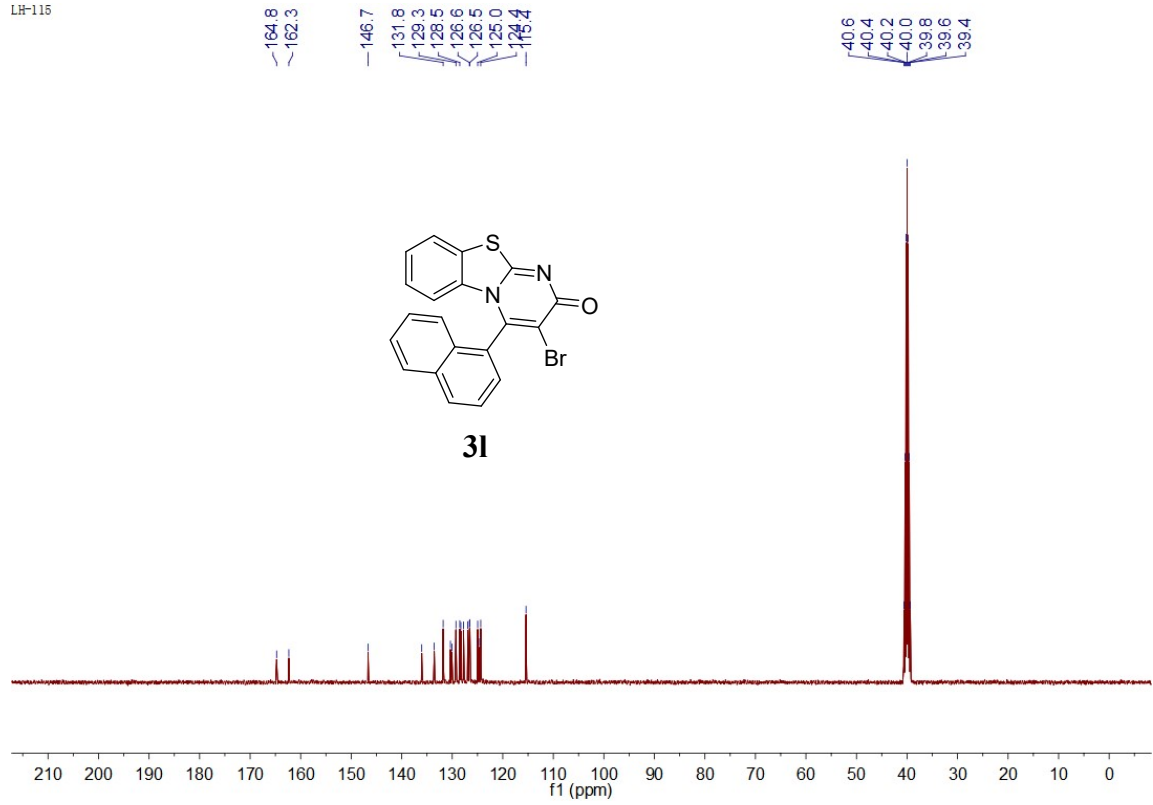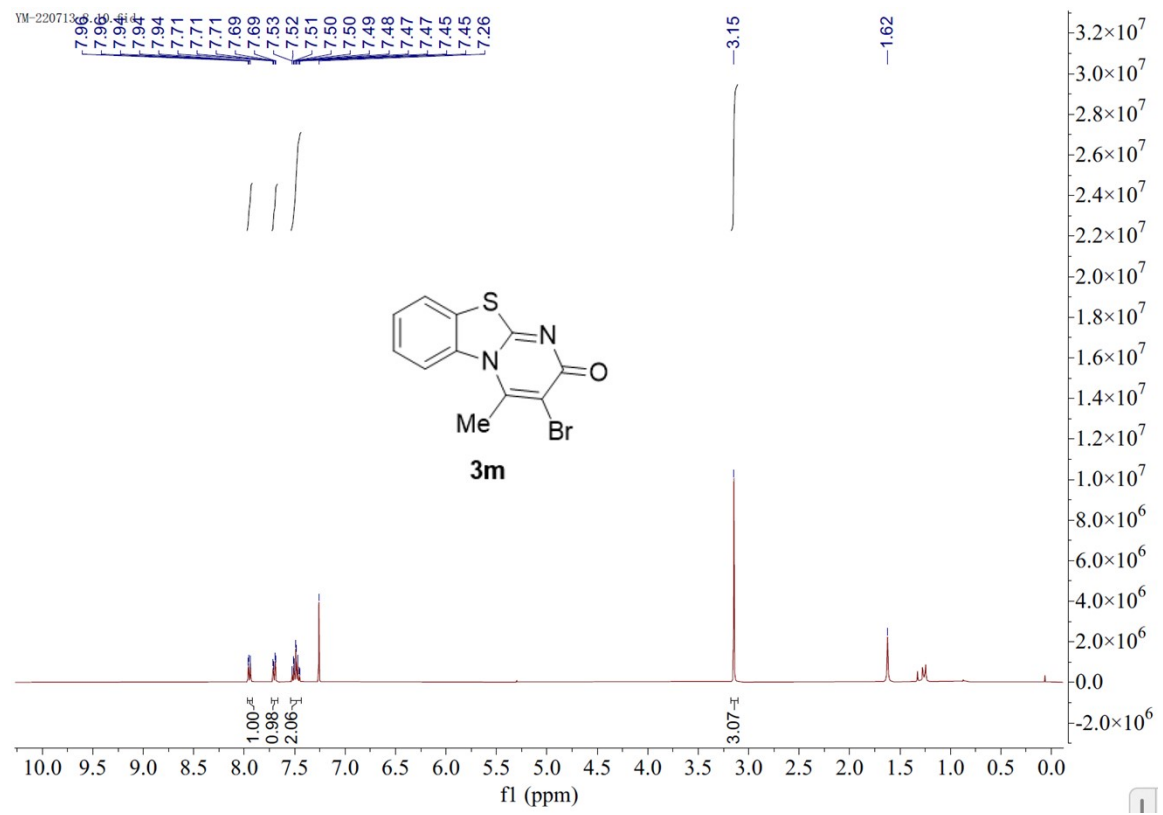

YM-220713-8.11.fid

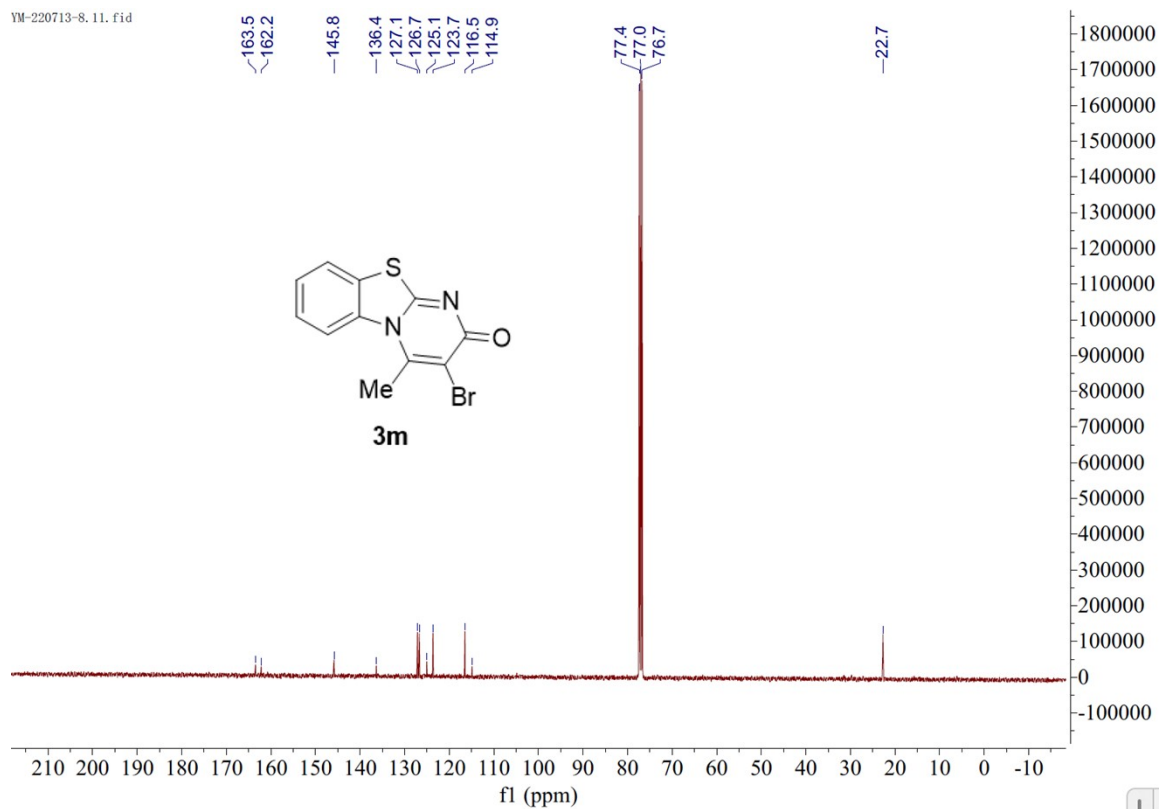

LH185-3

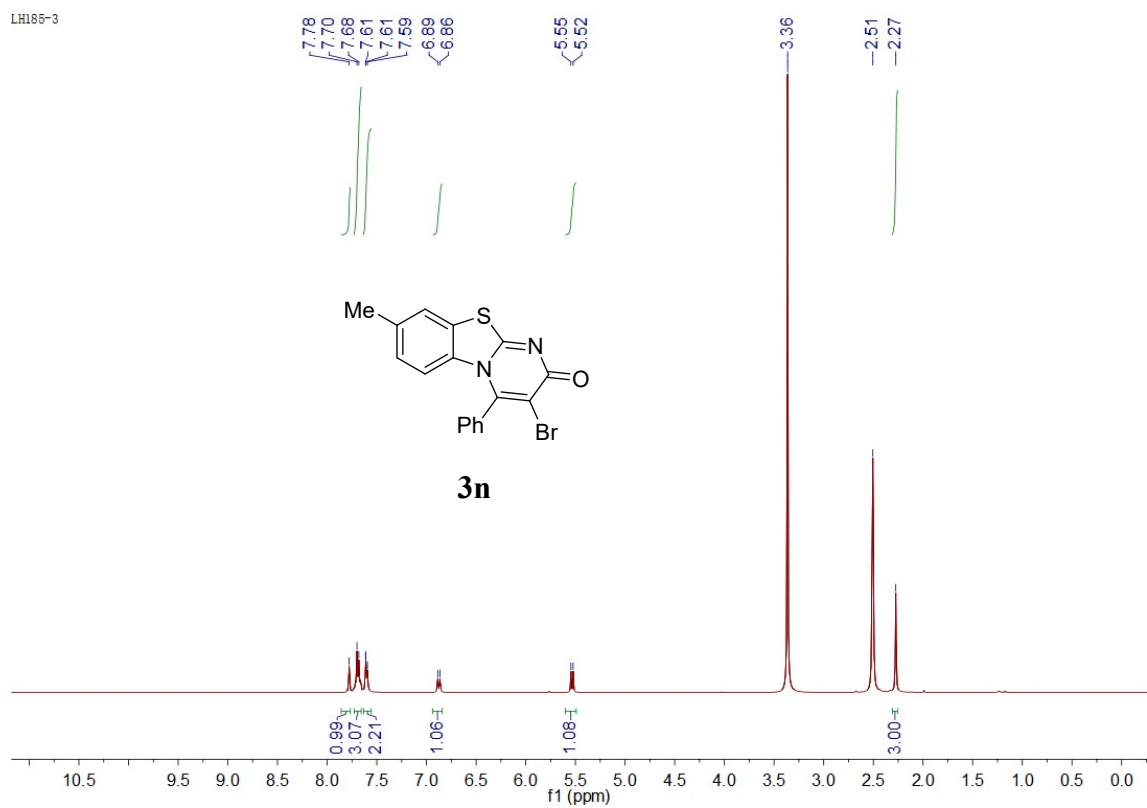

LH185-3

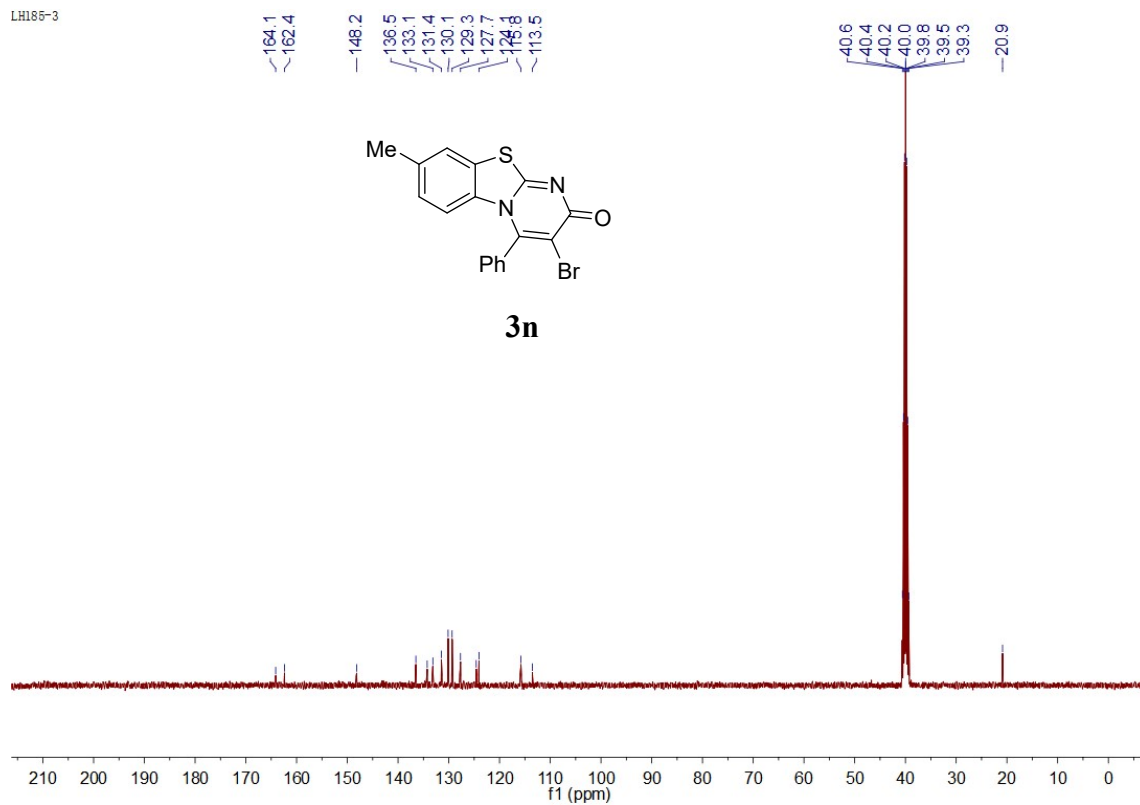

LH82

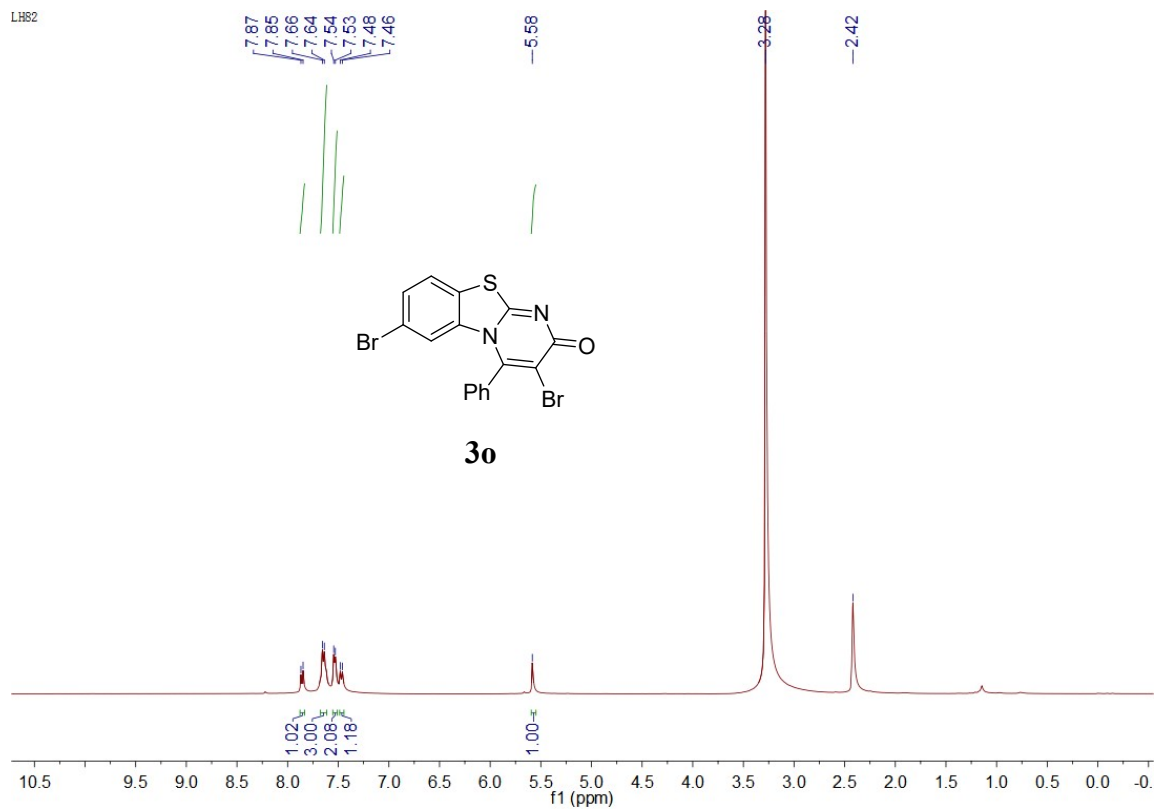

LH82

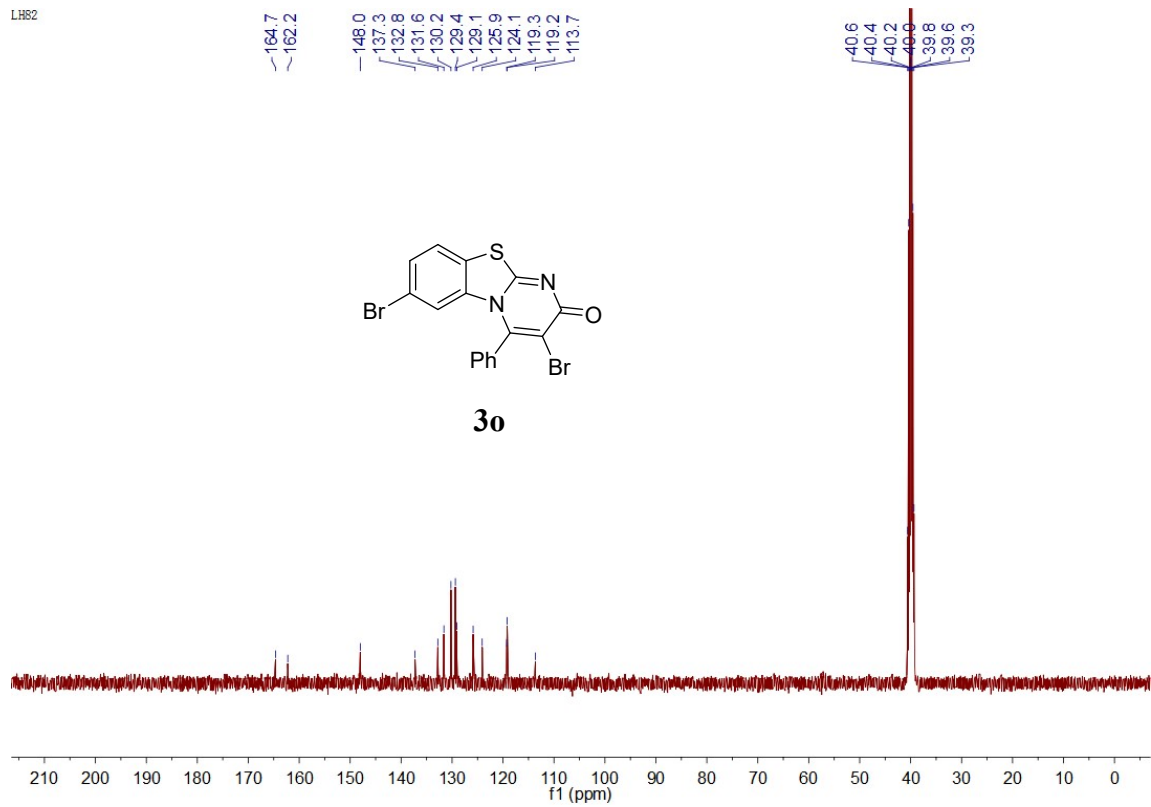

LH237

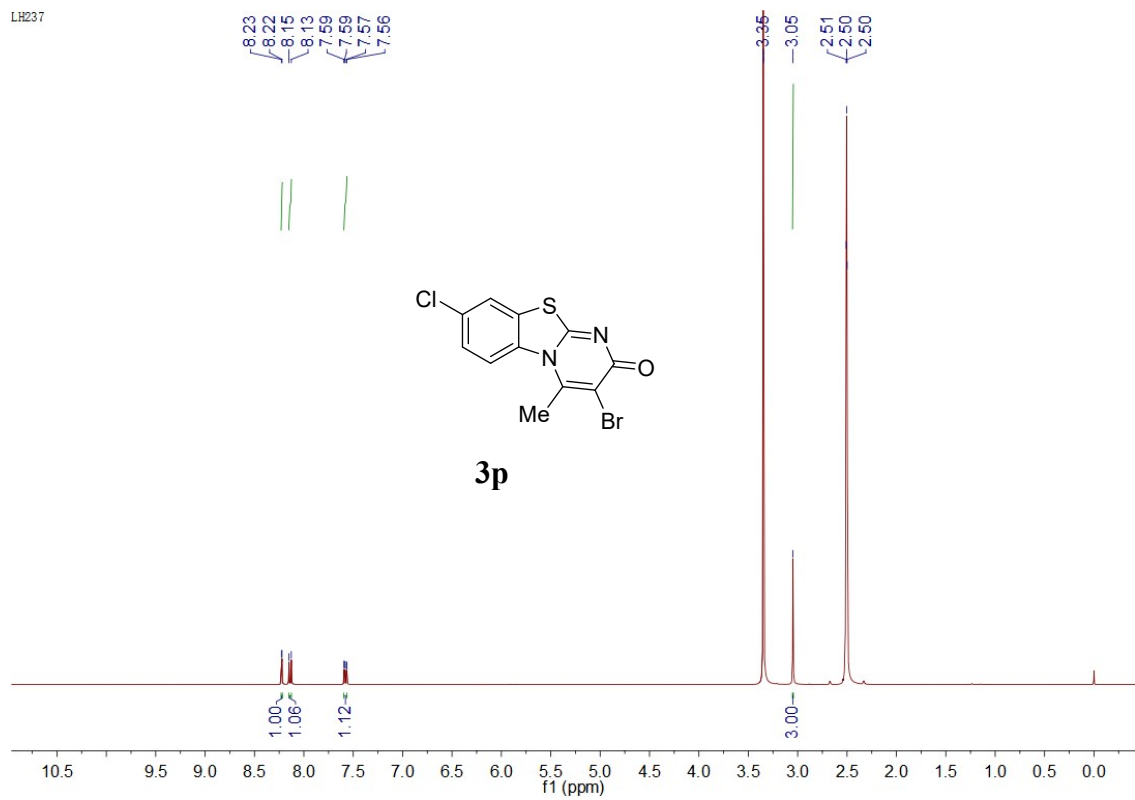

LH237

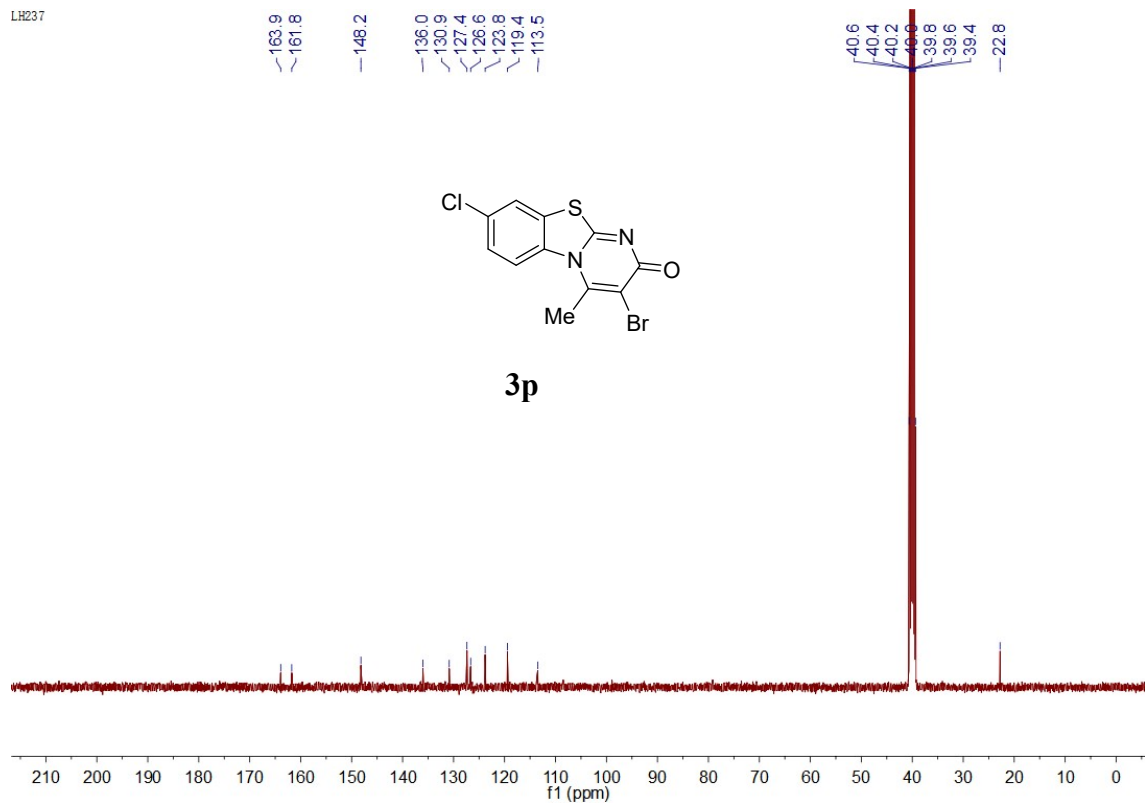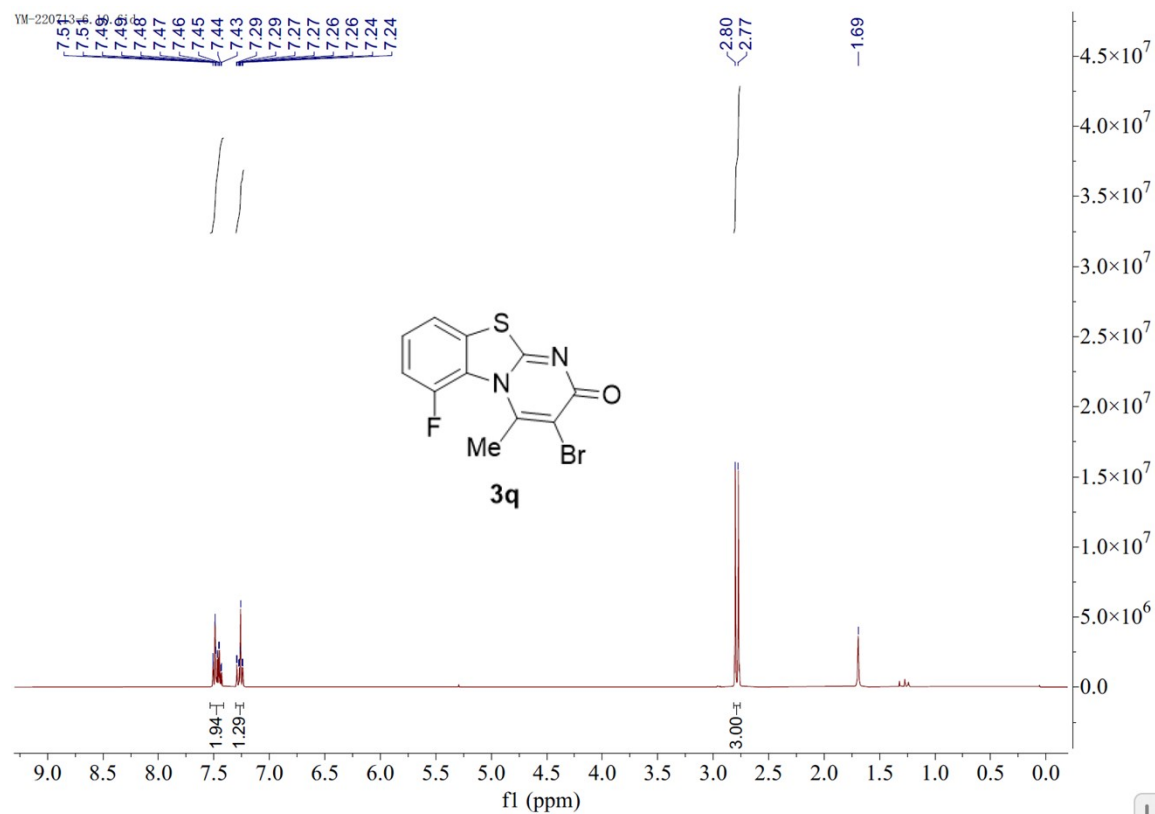



YM-220713-6.11.fid

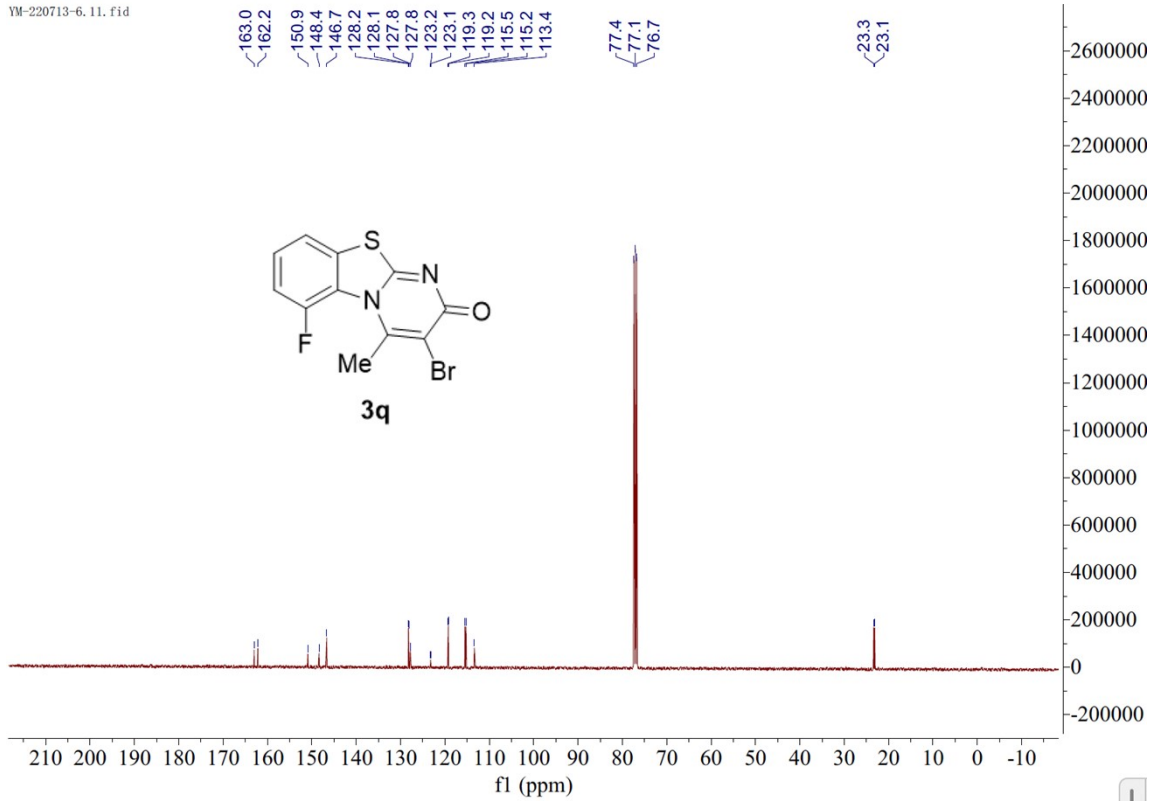

LH77

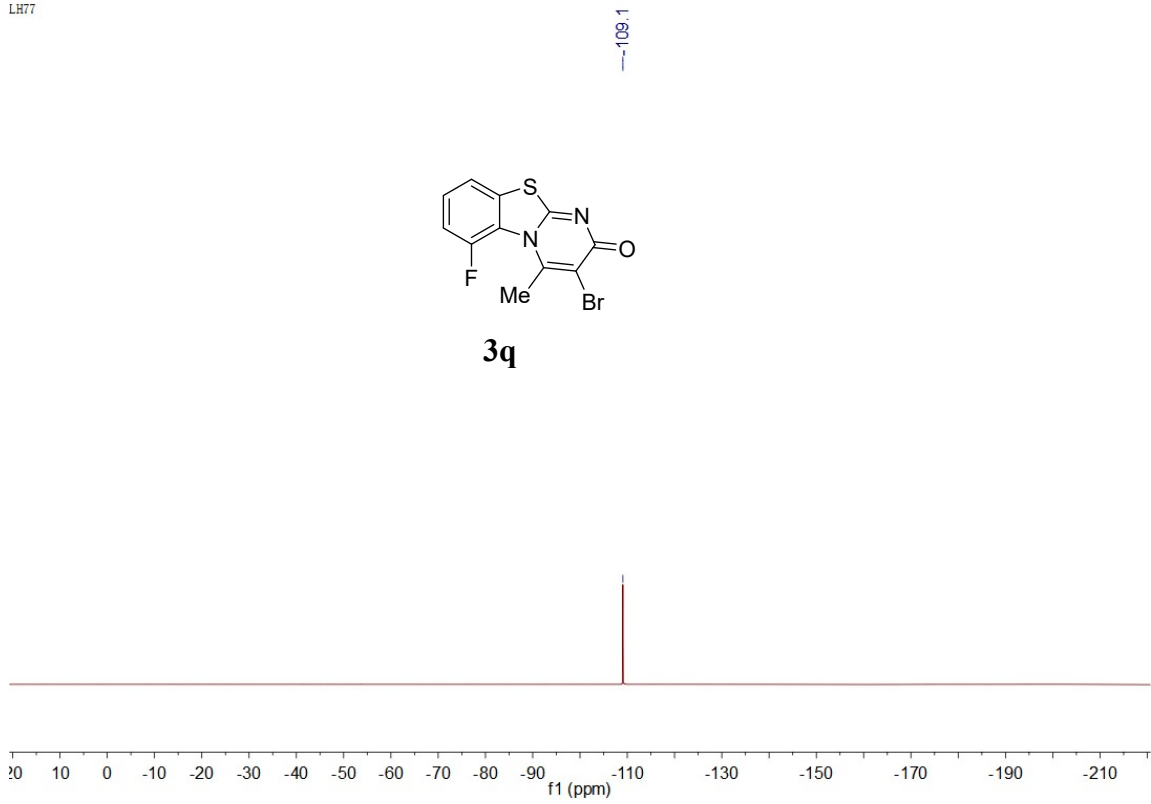

LH27

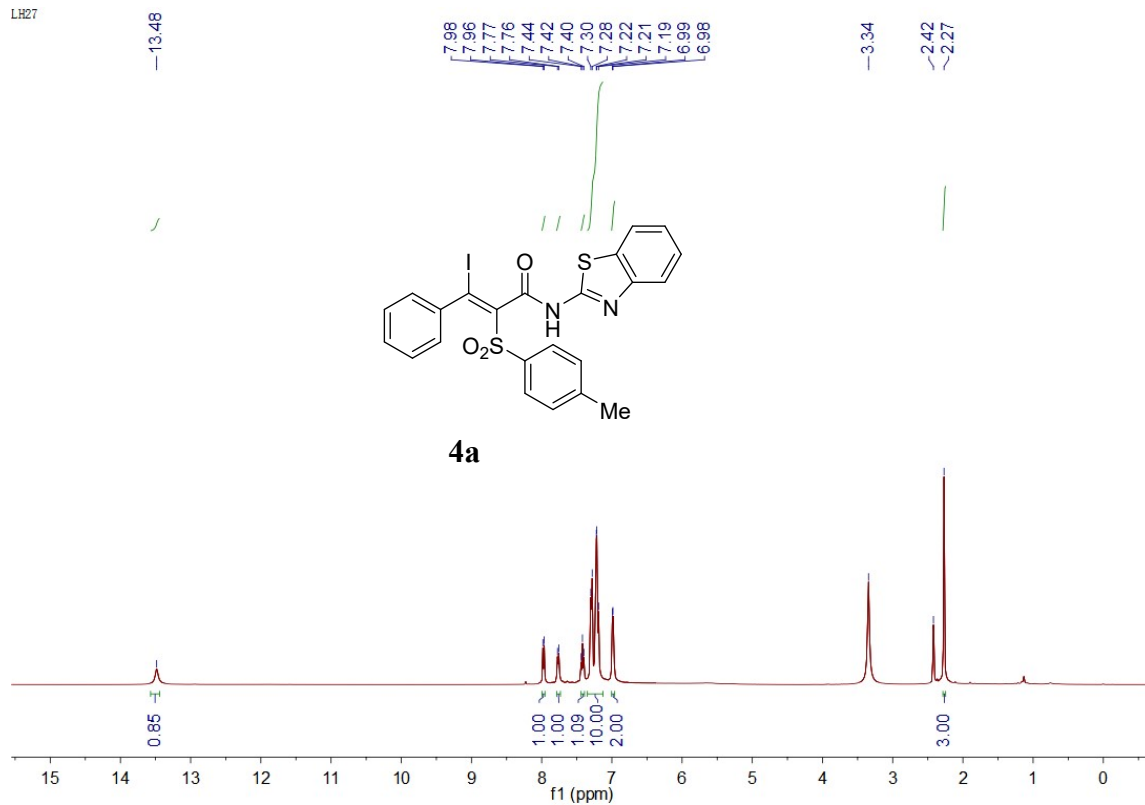

LH27

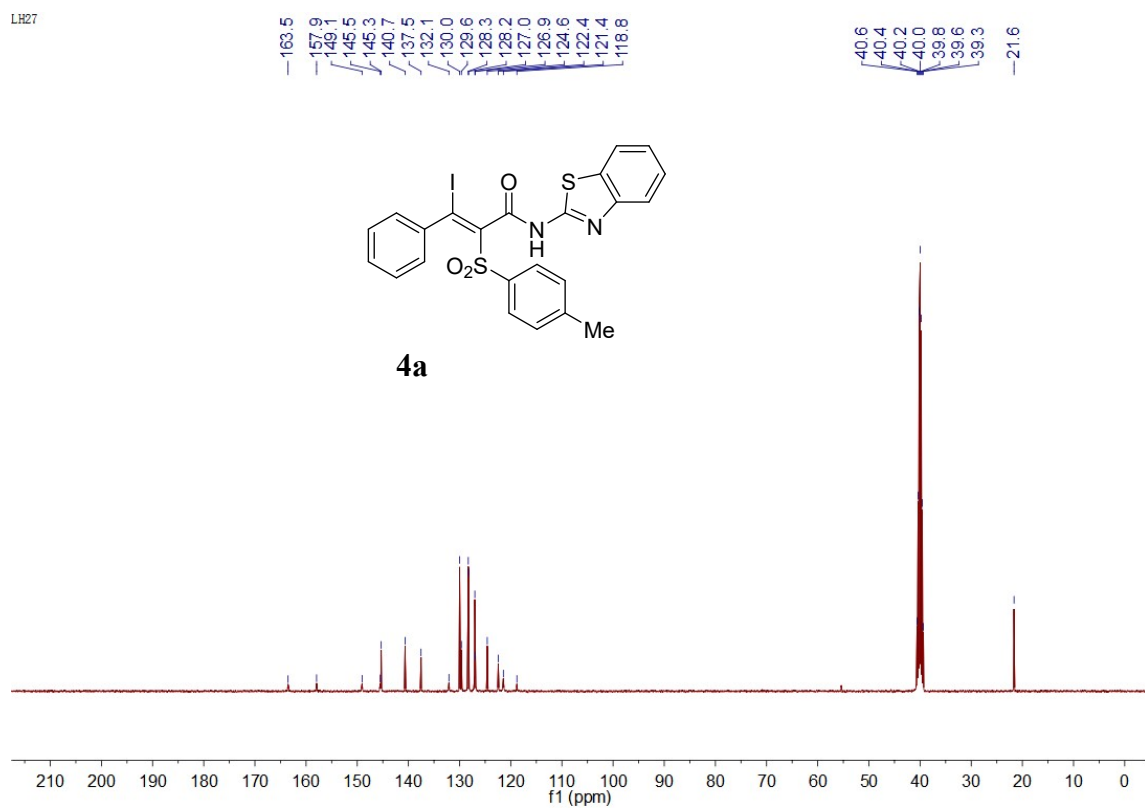

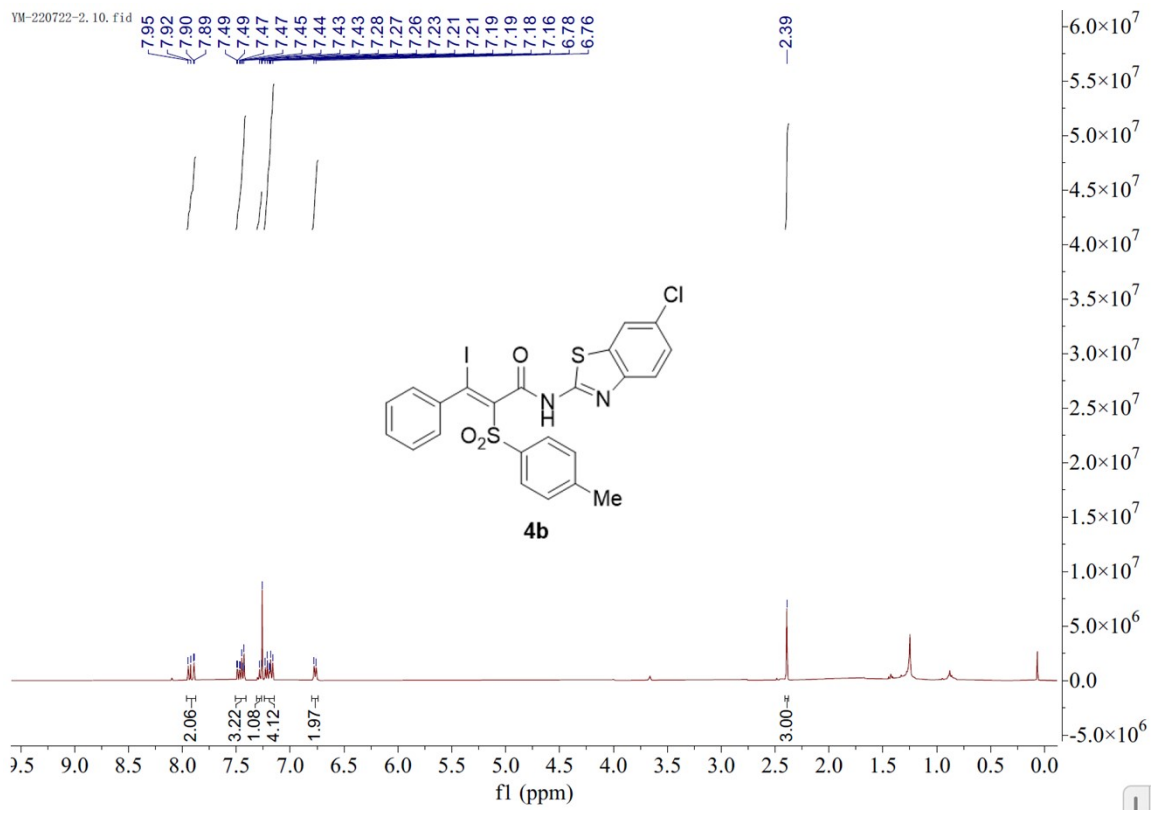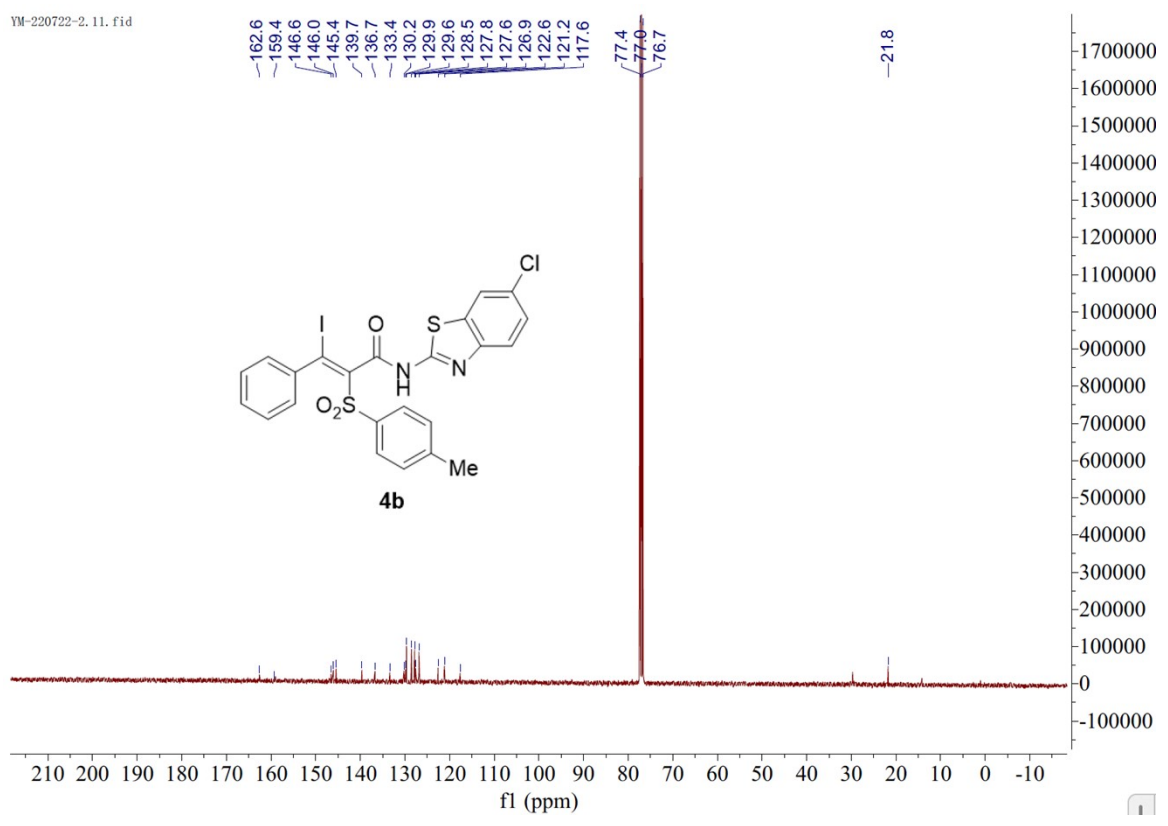

LH-112

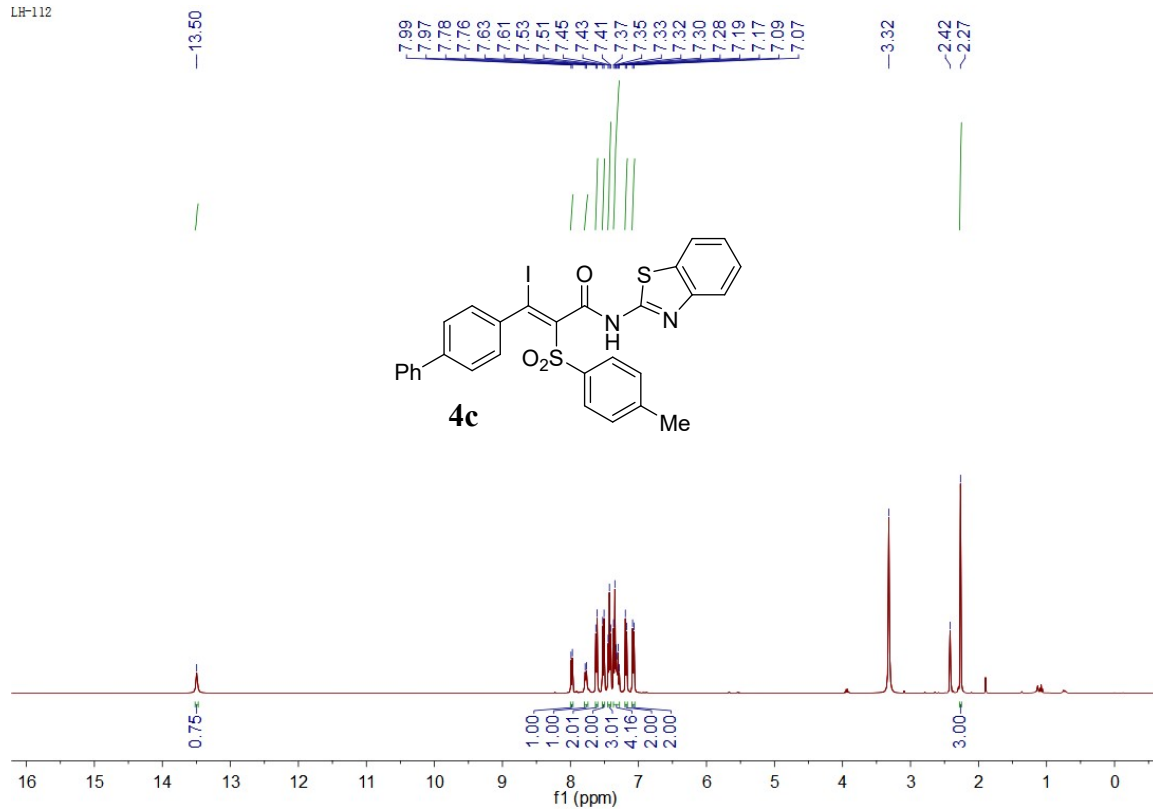

LH-112

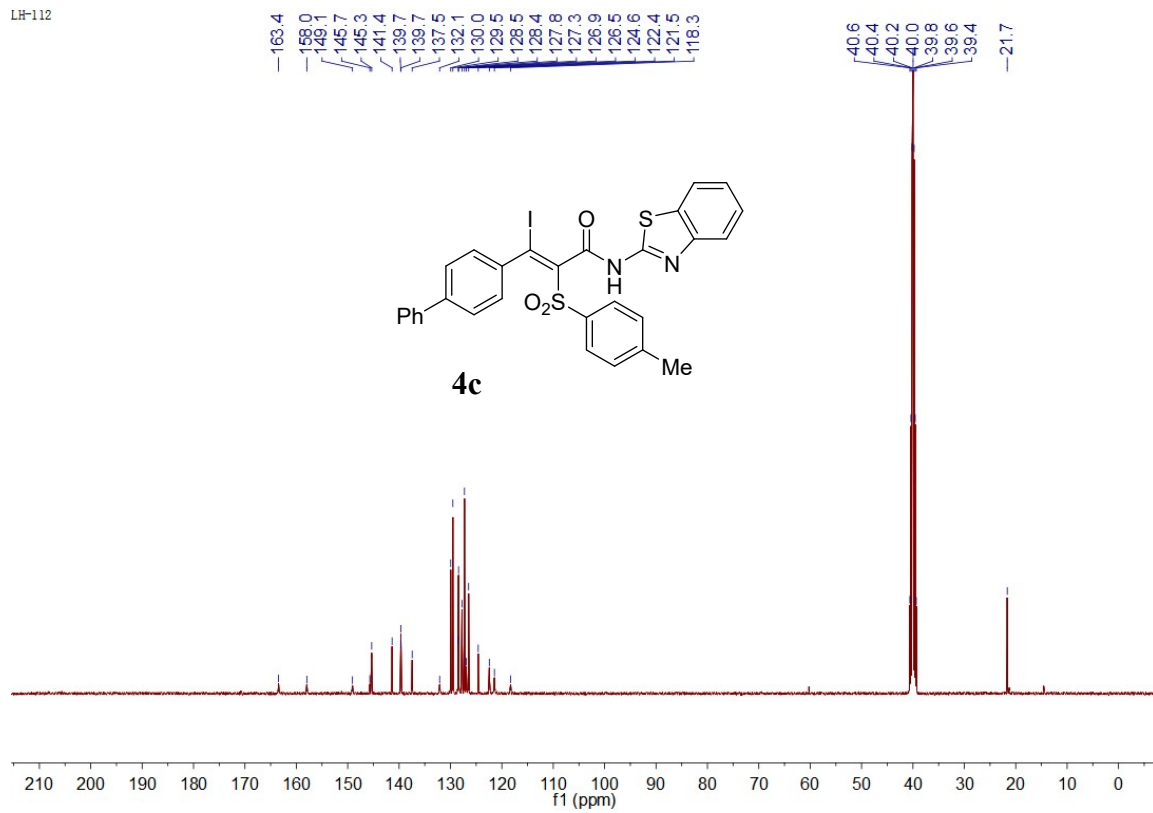

LH-111

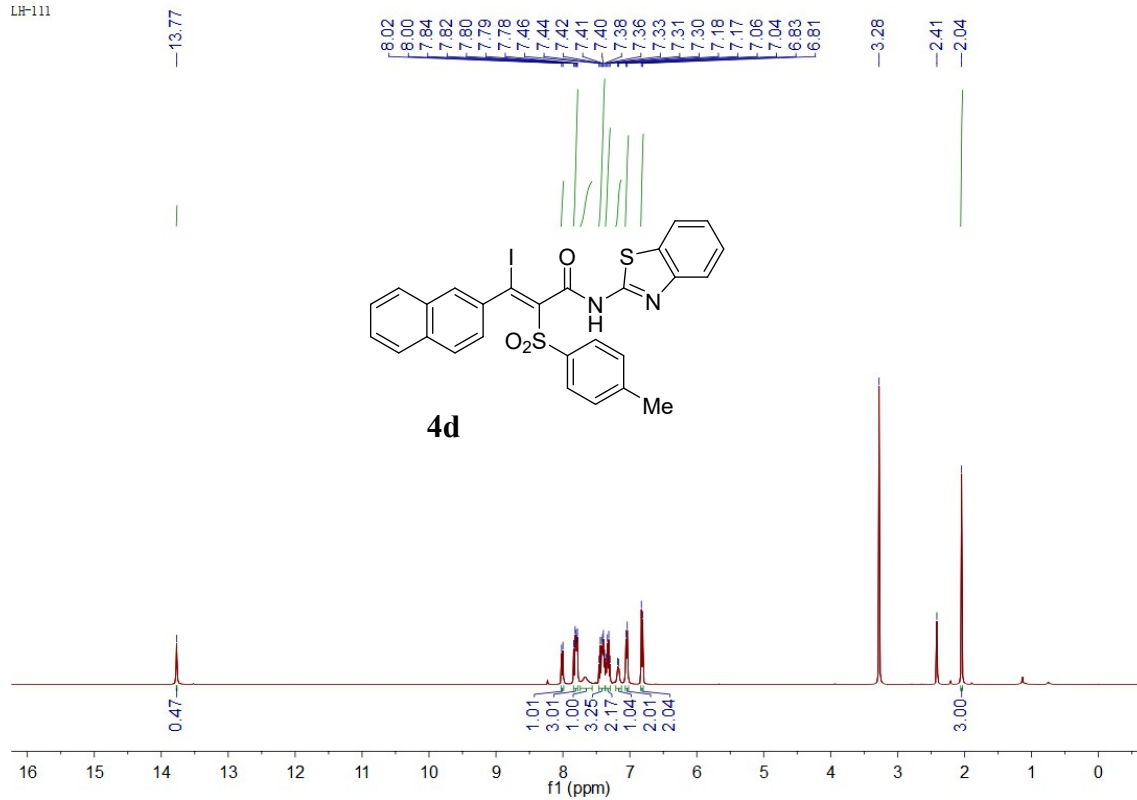

LH-111

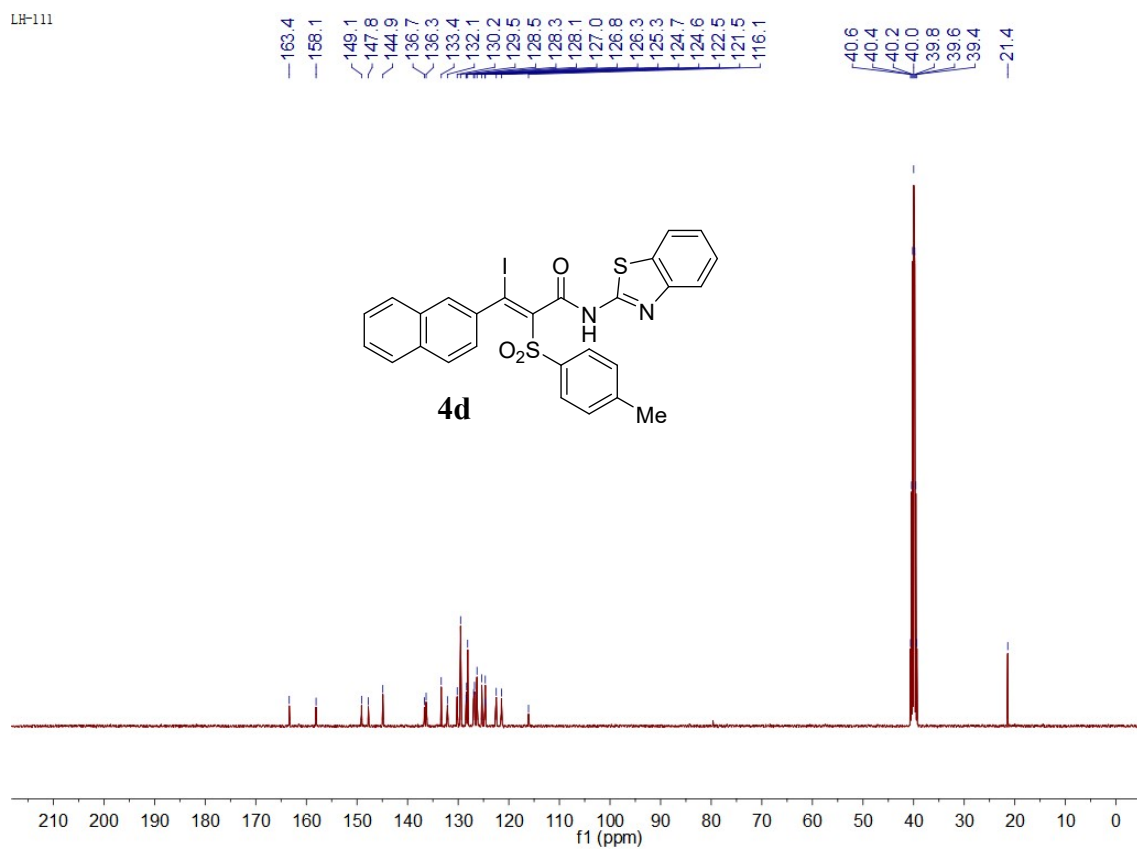

LH155-3

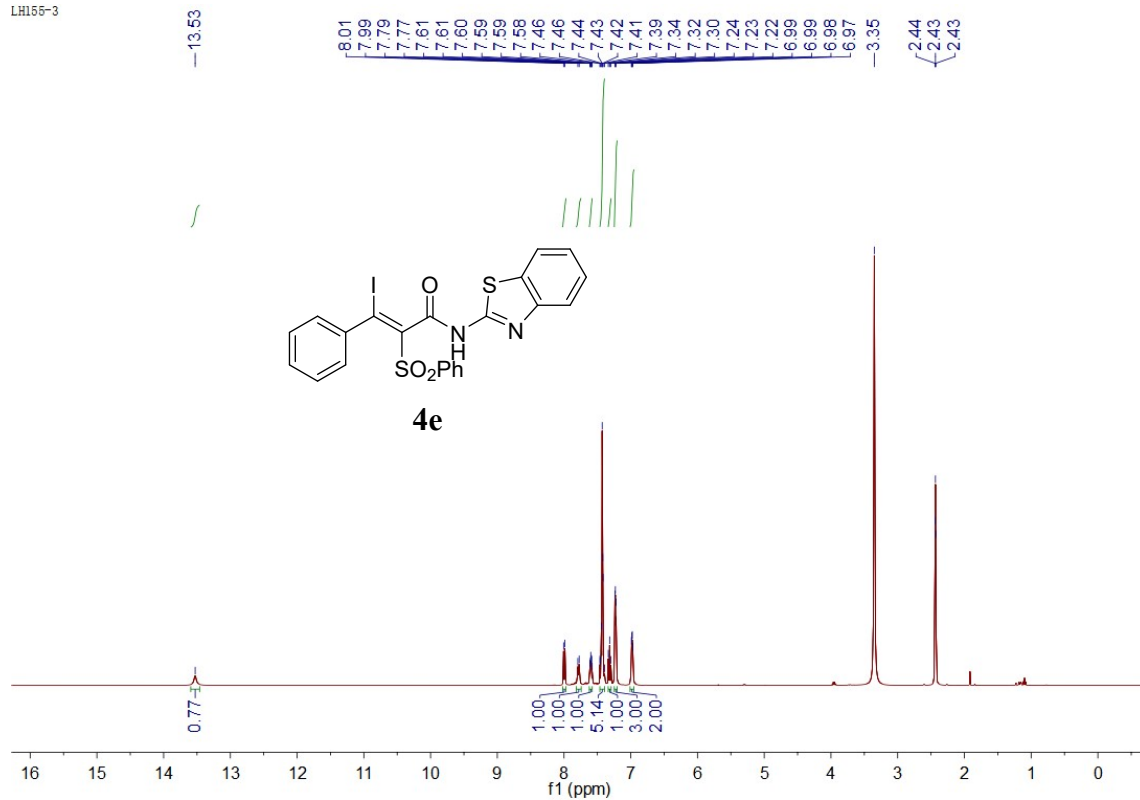

LH155-3

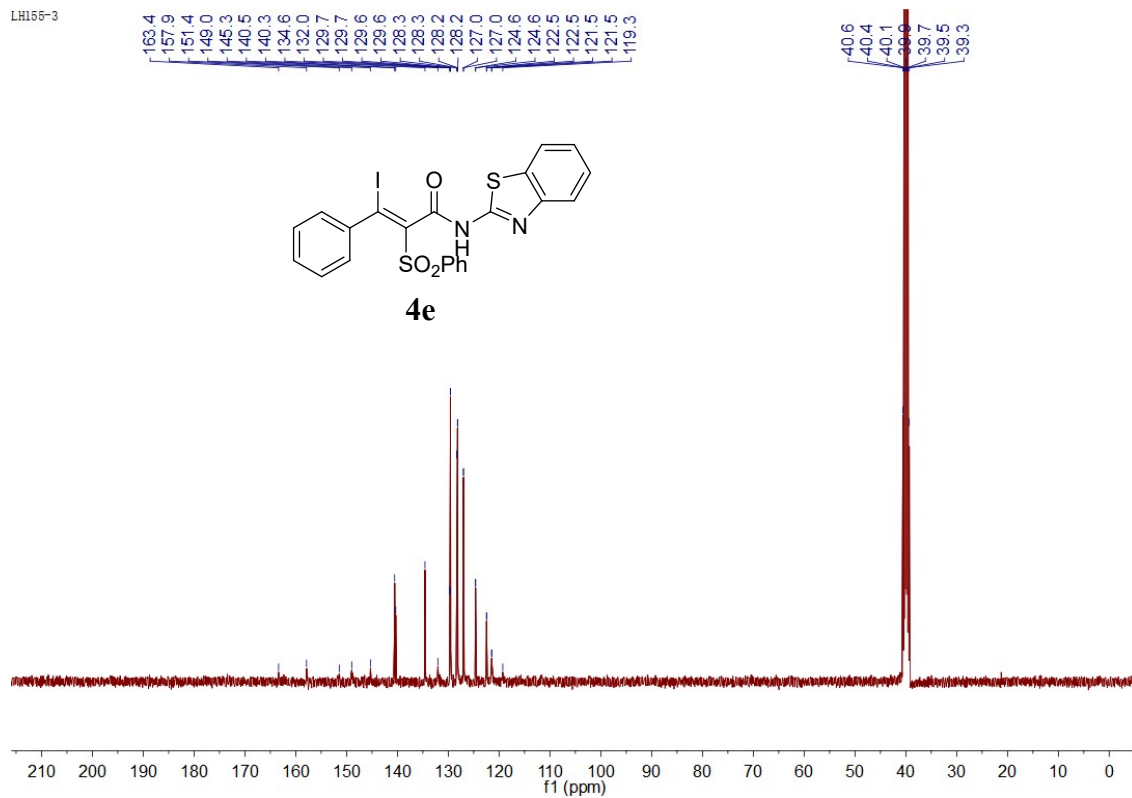

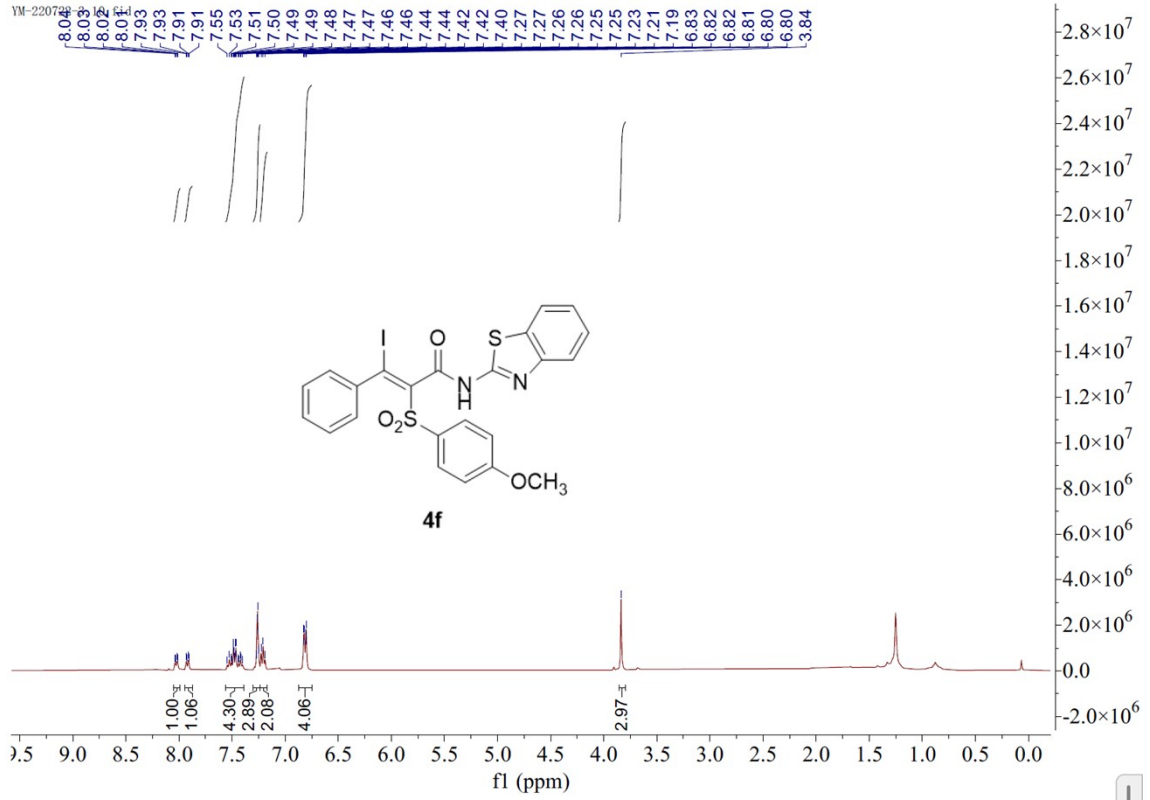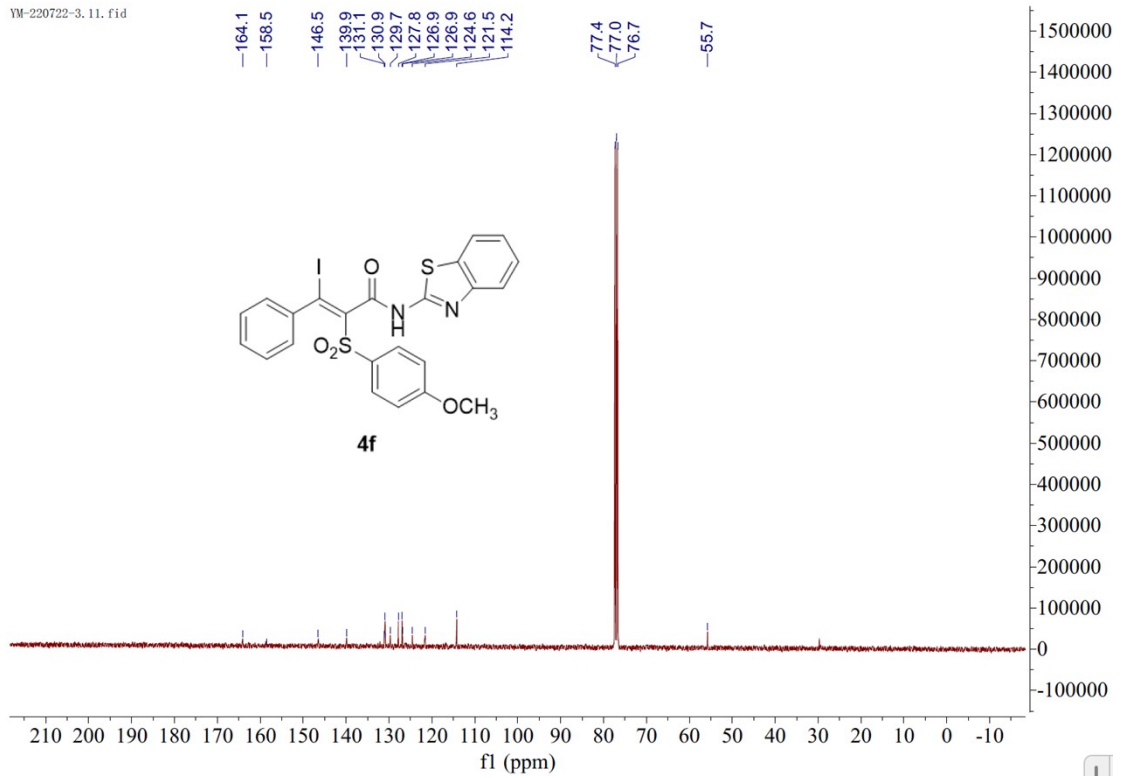

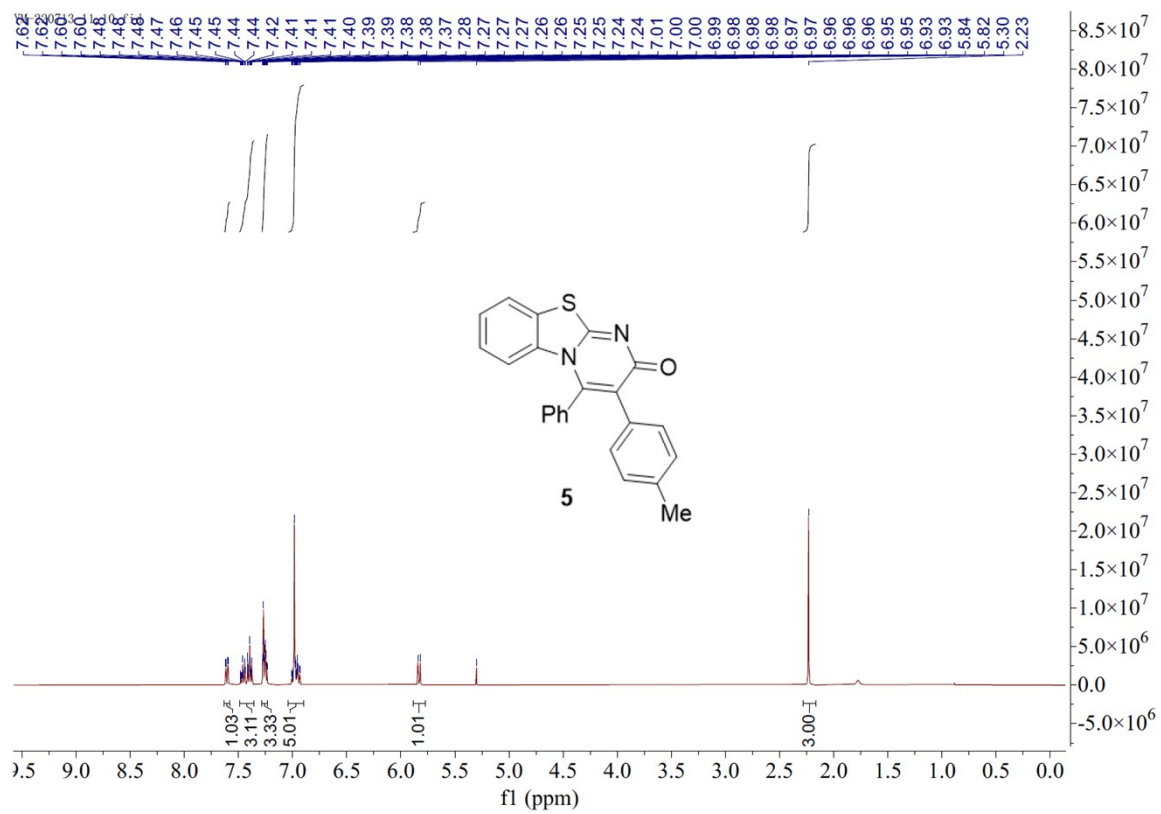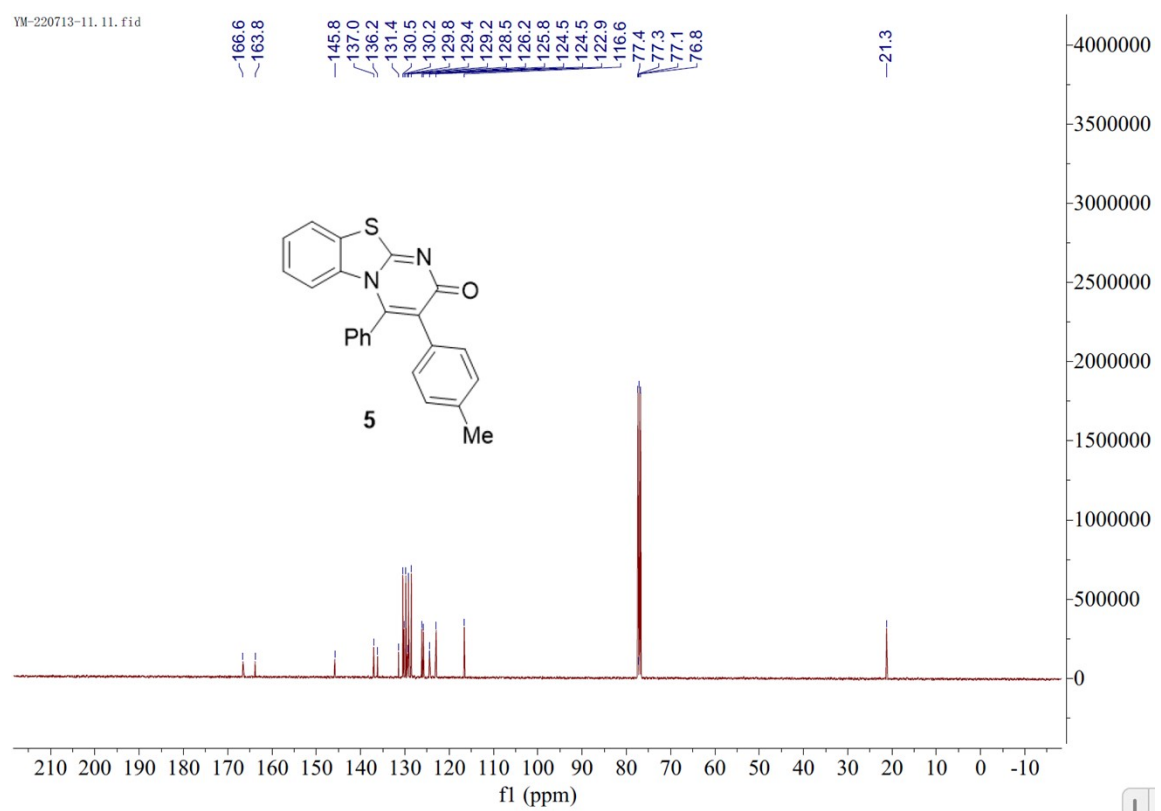



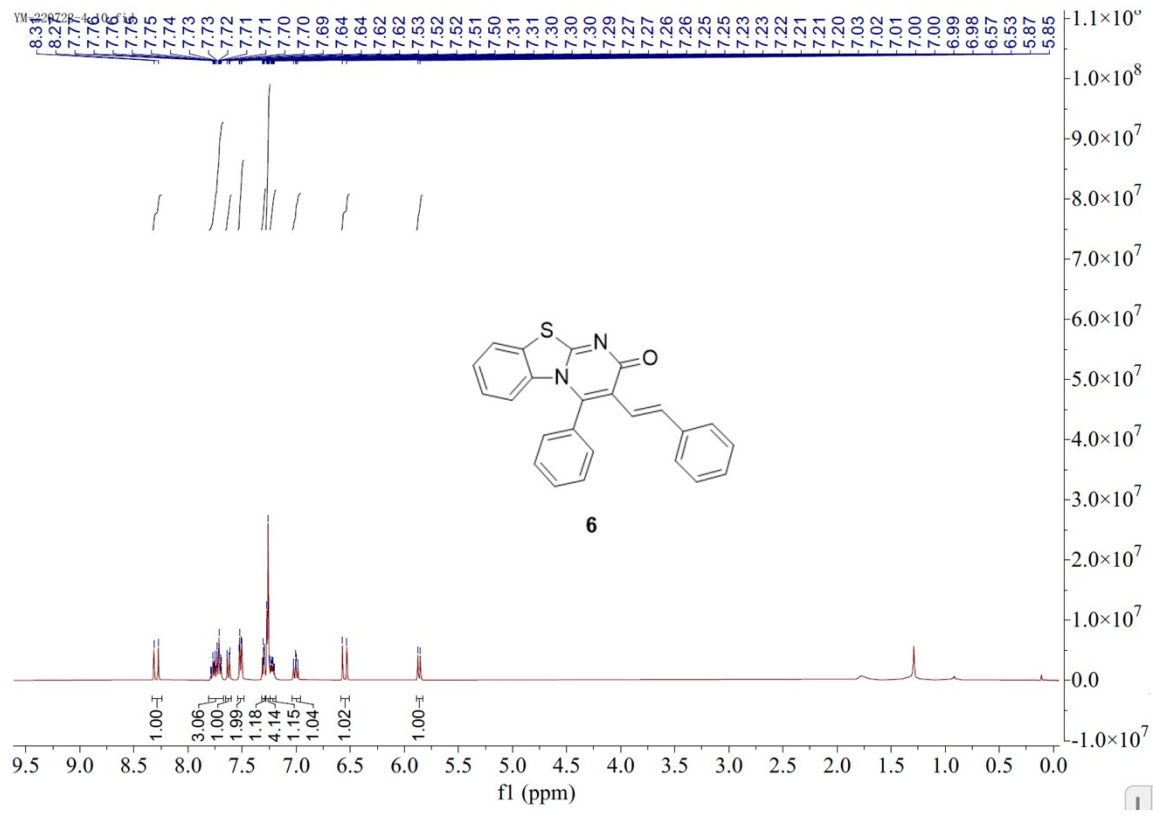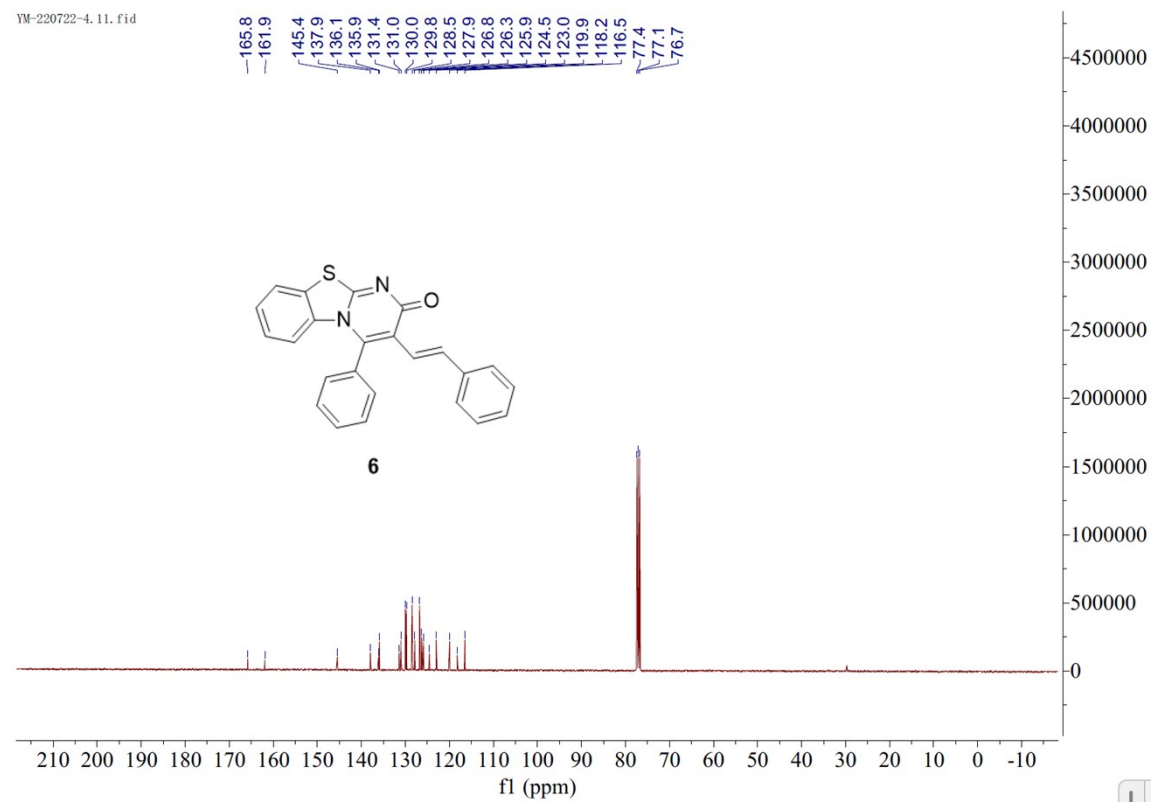

Supplement: d2ob01165d1.pdf [file d2ob01165d1.pdf]
